# Supplementary material for: Periodic Physical Disturbance: An Alternative Method for Controlling Sitophilus zeamais (Maize Weevil) Infestation
Source: Insects. 2016 Sep 29;7(4):51. doi: 10.3390/insects7040051 (PMC5198199; doi:10.3390/insects7040051)
Supplement: Supplementary file 1 [file insects-07-00051-s001.xlsx]

## Sheet: Research design
Completely Randomized Designs (CRD)
CRD was choosen because the experimental units are homogeneous, even though three regions (blocks) were present. This was discussed with a statistician.
Also treatments are assigned to experimental unitts completely at random (have the same probability of receiving any treatment)
Experimental errors were thus assumed to be independent and normally-distributed.
			Dodoma		Morogoro		Manyara
			Farmer	Expt. Unit	Farmer	Expt. Unit	Farmer	Expt. Unit
			Veronika	12	Shomari	21	Ismail	16
				23		17		12
				8		3		26
				C1		C9		C2
				15		5		5
				17		24		6
				13		7		21
				C8		C3		C7
				1		23		19
				11		19		24
				25		13		11
				C3		C5		C6
			Matha	9	Mariamu	16	Kassi	1
				19		27		8
				26		4		23
				C2		C1		C1
				21		18		15
				3		25		27
				22		7		17
				C9		C7		C4
				6		9		3
				16		20		10
				9		15		22
				C5		C4		C9
			Lucy	10	Rajabu	1	Monica	14
				5		22		2
				2		10		18
				C6		C2		C8
				18		12		4
				7		6		20
				24		26		7
				C4		C8		C5
				27		14		9
				20		2		25
				14		11		13
				C7		C6		C3

## Sheet: Initial populations
	storage time (days)	Initial number of populations
		Dodoma		Morogoro		Manyara
		Control	disturbed	Control	disturbed	Control	disturbed
	30	89	53	28	21	75	30
	60	52	54	25	27	73	41
	90	74	51	23	20	120	86

## Sheet: Dodoma
													PERCENTAGE MORTALITY
		Data Collection-Kilosa Region
		Farmer	Expt. Unit (container)	Initial ppn	1st month (Dec-15)		2nd month (Jan-16)		3rd month (Feb-16)
					Live	Dead	Live	Dead	Live	Dead			Farmer 1	Mortality (%)
		Veronika	12	68	4	64					24			1st month	2nd month	3rd month
			23	120	8	124								94.1176	100	100
			8	50	12	32								93.9394	94.4444	94.1176
			C1	40	4	44								72.7273	92.8571	100
			15	36			0	72					Treatment (%)	86.9281	95.7672	98.0392
			17	88			4	68					S.D	12.2986	3.75065	3.39618
			13	40			4	52					Control (%)	10	0	0
			C8	36			52	8
			1	104					0	98
			11	40					4	64			(%) mortality = (no. of dead insects/total no. of insects)*100
			25	50					0	58
			C3	40					88	32
		Matha	9	60	4	36
			19	12	4	40
			26	40	8	64
			C2	140	8	36							Farmer 2	Mortality (%)
			21	28			8	80						1st month	2nd month	3rd month
			3	44			0	52						90	90.9091	100
			22	32			4	80						90.9091	100	100
			C9	88			104	4						88.8889	95.2381	100
			6	36					0	48			Treatment (%)	89.9327	95.3824	100
			16	42					0	44			S.D	1.01178	4.54717	0
			9	52					0	56			Control (%)	7.69231	0	0
			C5	140					132	4
		Lucy	10	40	4	80
			5	20	4	80
			2	64	4	60								Mortality (%)
			C6	68	20	60							Farmer 3	1st month	2nd month	3rd month
			18	120			0	128						95.2381	100	100
			7	28			0	28						95.2381	100	100
			24	8			4	20						93.75	83.3333	100
			C4	32			48	8					Treatment (%)	94.7421	94.4444	100
			27	40					0	68			S.D	0.859152	9.6225	0
			20	40					0	80			Control (%)	12	25	19.0476
			14	52					0	48
			C7	42					108	8
													DODOMA SUMMARY
														Mortality (%)
														1st month	2nd month	3rd month
													Treatment (%)	90.5343	95.198	99.3464
													S.D	3.94157	0.680379	1.13206
													Control (%)	9.89744	8.33333	6.34921
					proc glimmix data=Physical disturbance;
					class rep reg time;
					model mort = reg|time;
					random reg*time*rep;
					lsmeans mort*time / slicediff=reg lines adjust=tukey plot=mean(plotby=time sliceby=reg join cl);
					Proc corr data = Physical disturbance;
					Var mort reg time;

## Sheet: Dodoma-Temp
	Time	Celsius(°C)	Humidity(%rh)	Dew Point(°C)		Summary
1	2016-01-19 18:00:00	29.5	58.5	20.5			Temp	R.H	D.P
2	2016-01-19 19:00:00	29.5	60.5	21		Max	33	77	23.7
3	2016-01-19 20:00:00	28.5	62.5	20.6		Min	23.5	48	17.6
4	2016-01-19 21:00:00	27.5	62.5	19.7		Average	27.5	66.1	20.5
5	2016-01-19 22:00:00	27.5	63.5	20		S.D	1.7	4.5	1
6	2016-01-19 23:00:00	27.5	64	20.1
7	2016-01-20	27.5	64.5	20.2
8	2016-01-20 01:00:00	27.5	65	20.3
9	2016-01-20 02:00:00	27.5	65	20.3
10	2016-01-20 03:00:00	27	64.5	19.7
11	2016-01-20 04:00:00	27	65	19.9
12	2016-01-20 05:00:00	27	65	19.9
13	2016-01-20 06:00:00	26.5	65	19.4
14	2016-01-20 07:00:00	26.5	65.5	19.5
15	2016-01-20 08:00:00	26.5	66.5	19.7
16	2016-01-20 09:00:00	26	67	19.4
17	2016-01-20 10:00:00	26.5	67	19.9
18	2016-01-20 11:00:00	26.5	66.5	19.7
19	2016-01-20 12:00:00	27	66.5	20.2
20	2016-01-20 13:00:00	27	65.5	20
21	2016-01-20 14:00:00	27	65	19.9
22	2016-01-20 15:00:00	27.5	65	20.3
23	2016-01-20 16:00:00	28	66	21.1
24	2016-01-20 17:00:00	28.5	64.5	21.1
25	2016-01-20 18:00:00	28.5	64	21
26	2016-01-20 19:00:00	28.5	64	21
27	2016-01-20 20:00:00	28	64	20.6
28	2016-01-20 21:00:00	28	64	20.6
29	2016-01-20 22:00:00	27.5	64.5	20.2
30	2016-01-20 23:00:00	27.5	65	20.3
31	2016-01-21	27.5	65.5	20.5
32	2016-01-21 01:00:00	27.5	66	20.6
33	2016-01-21 02:00:00	27	66.5	20.2
34	2016-01-21 03:00:00	27	66.5	20.2
35	2016-01-21 04:00:00	27	67	20.3
36	2016-01-21 05:00:00	27	67	20.3
37	2016-01-21 06:00:00	27	67.5	20.5
38	2016-01-21 07:00:00	26.5	67.5	20
39	2016-01-21 08:00:00	26.5	68	20.1
40	2016-01-21 09:00:00	26.5	69	20.3
41	2016-01-21 10:00:00	26.5	70	20.6
42	2016-01-21 11:00:00	27	69	20.8
43	2016-01-21 12:00:00	27.5	68.5	21.2
44	2016-01-21 13:00:00	27.5	67	20.8
45	2016-01-21 14:00:00	27.5	68	21.1
46	2016-01-21 15:00:00	27.5	68.5	21.2
47	2016-01-21 16:00:00	27.5	66.5	20.7
48	2016-01-21 17:00:00	27	67	20.3
49	2016-01-21 18:00:00	26.5	67.5	20
50	2016-01-21 19:00:00	26.5	68	20.1
51	2016-01-21 20:00:00	26	68	19.6
52	2016-01-21 21:00:00	26	68	19.6
53	2016-01-21 22:00:00	26	68.5	19.8
54	2016-01-21 23:00:00	26	68.5	19.8
55	2016-01-22	26	68.5	19.8
56	2016-01-22 01:00:00	25.5	68.5	19.3
57	2016-01-22 02:00:00	25.5	68.5	19.3
58	2016-01-22 03:00:00	25.5	69	19.4
59	2016-01-22 04:00:00	25.5	69	19.4
60	2016-01-22 05:00:00	25	69	18.9
61	2016-01-22 06:00:00	25	69.5	19
62	2016-01-22 07:00:00	25	69.5	19
63	2016-01-22 08:00:00	25	70.5	19.3
64	2016-01-22 09:00:00	25	72	19.6
65	2016-01-22 10:00:00	25.5	72	20.1
66	2016-01-22 11:00:00	26.5	71	20.8
67	2016-01-22 12:00:00	27	70.5	21.2
68	2016-01-22 13:00:00	28	70	22
69	2016-01-22 14:00:00	29	68.5	22.6
70	2016-01-22 15:00:00	29.5	65.5	22.3
71	2016-01-22 16:00:00	30.5	63	22.7
72	2016-01-22 17:00:00	30	63.5	22.3
73	2016-01-22 18:00:00	29.5	65	22.2
74	2016-01-22 19:00:00	29	66.5	22.1
75	2016-01-22 20:00:00	28.5	65.5	21.4
76	2016-01-22 21:00:00	28.5	67	21.8
77	2016-01-22 22:00:00	28	67	21.3
78	2016-01-22 23:00:00	28	67.5	21.4
79	2016-01-23	28	68	21.5
80	2016-01-23 01:00:00	28	68.5	21.7
81	2016-01-23 02:00:00	27.5	68.5	21.2
82	2016-01-23 03:00:00	27.5	68	21.1
83	2016-01-23 04:00:00	27.5	68.5	21.2
84	2016-01-23 05:00:00	27	68.5	20.7
85	2016-01-23 06:00:00	27	68.5	20.7
86	2016-01-23 07:00:00	27	69	20.8
87	2016-01-23 08:00:00	27	69.5	20.9
88	2016-01-23 09:00:00	27	69	20.8
89	2016-01-23 10:00:00	27	69	20.8
90	2016-01-23 11:00:00	27.5	67.5	20.9
91	2016-01-23 12:00:00	28	64.5	20.7
92	2016-01-23 13:00:00	28.5	64	21
93	2016-01-23 14:00:00	29	63	21.2
94	2016-01-23 15:00:00	29	62.5	21.1
95	2016-01-23 16:00:00	29	62.5	21.1
96	2016-01-23 17:00:00	29	62.5	21.1
97	2016-01-23 18:00:00	29	64	21.5
98	2016-01-23 19:00:00	29	65	21.7
99	2016-01-23 20:00:00	28.5	65.5	21.4
100	2016-01-23 21:00:00	28	66.5	21.2
101	2016-01-23 22:00:00	28	66	21.1
102	2016-01-23 23:00:00	28	66	21.1
103	2016-01-24	28	66.5	21.2
104	2016-01-24 01:00:00	27.5	66	20.6
105	2016-01-24 02:00:00	27.5	66.5	20.7
106	2016-01-24 03:00:00	27.5	66.5	20.7
107	2016-01-24 04:00:00	27.5	67	20.8
108	2016-01-24 05:00:00	27	67	20.3
109	2016-01-24 06:00:00	27	67.5	20.5
110	2016-01-24 07:00:00	27	67.5	20.5
111	2016-01-24 08:00:00	27	68.5	20.7
112	2016-01-24 09:00:00	27	68	20.6
113	2016-01-24 10:00:00	27	68.5	20.7
114	2016-01-24 11:00:00	27	67.5	20.5
115	2016-01-24 12:00:00	27.5	66.5	20.7
116	2016-01-24 13:00:00	28	65	20.8
117	2016-01-24 14:00:00	28.5	64.5	21.1
118	2016-01-24 15:00:00	29	63	21.2
119	2016-01-24 16:00:00	29.5	61.5	21.3
120	2016-01-24 17:00:00	29.5	61	21.2
121	2016-01-24 18:00:00	30	61	21.7
122	2016-01-24 19:00:00	29.5	63	21.7
123	2016-01-24 20:00:00	29.5	64	22
124	2016-01-24 21:00:00	29	65	21.7
125	2016-01-24 22:00:00	29	65.5	21.9
126	2016-01-24 23:00:00	29	66	22
127	2016-01-25	29	66	22
128	2016-01-25 01:00:00	28.5	66.5	21.6
129	2016-01-25 02:00:00	28.5	66	21.5
130	2016-01-25 03:00:00	28	66	21.1
131	2016-01-25 04:00:00	28	66	21.1
132	2016-01-25 05:00:00	27.5	66	20.6
133	2016-01-25 06:00:00	27.5	66	20.6
134	2016-01-25 07:00:00	27.5	66.5	20.7
135	2016-01-25 08:00:00	27	67	20.3
136	2016-01-25 09:00:00	27	66.5	20.2
137	2016-01-25 10:00:00	27.5	66.5	20.7
138	2016-01-25 11:00:00	28.5	65.5	21.4
139	2016-01-25 12:00:00	29	64.5	21.6
140	2016-01-25 13:00:00	30	62	21.9
141	2016-01-25 14:00:00	28.5	62.5	20.6
142	2016-01-25 15:00:00	27.5	61	19.3
143	2016-01-25 16:00:00	27.5	64.5	20.2
144	2016-01-25 17:00:00	28	65	20.8
145	2016-01-25 18:00:00	27.5	64	20.1
146	2016-01-25 19:00:00	27	64	19.6
147	2016-01-25 20:00:00	27	64.5	19.7
148	2016-01-25 21:00:00	27	64.5	19.7
149	2016-01-25 22:00:00	26.5	64.5	19.3
150	2016-01-25 23:00:00	26.5	65	19.4
151	2016-01-26	26.5	65.5	19.5
152	2016-01-26 01:00:00	26	66	19.2
153	2016-01-26 02:00:00	26	66.5	19.3
154	2016-01-26 03:00:00	26	66.5	19.3
155	2016-01-26 04:00:00	26	67	19.4
156	2016-01-26 05:00:00	25.5	67	18.9
157	2016-01-26 06:00:00	25.5	67	18.9
158	2016-01-26 07:00:00	25.5	67.5	19
159	2016-01-26 08:00:00	25.5	68	19.2
160	2016-01-26 09:00:00	25	68.5	18.8
161	2016-01-26 10:00:00	25	68.5	18.8
162	2016-01-26 11:00:00	25.5	68	19.2
163	2016-01-26 12:00:00	26	67	19.4
164	2016-01-26 13:00:00	27	65.5	20
165	2016-01-26 14:00:00	27.5	64.5	20.2
166	2016-01-26 15:00:00	28.5	63	20.8
167	2016-01-26 16:00:00	29	61.5	20.8
168	2016-01-26 17:00:00	29.5	60.5	21
169	2016-01-26 18:00:00	29.5	60.5	21
170	2016-01-26 19:00:00	29	61	20.7
171	2016-01-26 20:00:00	28.5	61	20.2
172	2016-01-26 21:00:00	28	62	20
173	2016-01-26 22:00:00	28	62	20
174	2016-01-26 23:00:00	28	63	20.3
175	2016-01-27	27.5	63	19.8
176	2016-01-27 01:00:00	27.5	63.5	20
177	2016-01-27 02:00:00	27.5	63.5	20
178	2016-01-27 03:00:00	27	64	19.6
179	2016-01-27 04:00:00	27	64	19.6
180	2016-01-27 05:00:00	27	64	19.6
181	2016-01-27 06:00:00	26.5	64	19.1
182	2016-01-27 07:00:00	26.5	64.5	19.3
183	2016-01-27 08:00:00	26	64	18.7
184	2016-01-27 09:00:00	26	64.5	18.8
185	2016-01-27 10:00:00	25.5	65	18.4
186	2016-01-27 11:00:00	26	65.5	19
187	2016-01-27 12:00:00	27	63	19.4
188	2016-01-27 13:00:00	27.5	61.5	19.4
189	2016-01-27 14:00:00	28	60	19.5
190	2016-01-27 15:00:00	28	59	19.2
191	2016-01-27 16:00:00	29	58.5	20
192	2016-01-27 17:00:00	29.5	56	19.8
193	2016-01-27 18:00:00	29.5	55.5	19.7
194	2016-01-27 19:00:00	29.5	59.5	20.8
195	2016-01-27 20:00:00	29	61.5	20.8
196	2016-01-27 21:00:00	28.5	62	20.5
197	2016-01-27 22:00:00	28.5	63	20.8
198	2016-01-27 23:00:00	28.5	63	20.8
199	2016-01-28	28.5	63	20.8
200	2016-01-28 01:00:00	28.5	63.5	20.9
201	2016-01-28 02:00:00	28	63.5	20.4
202	2016-01-28 03:00:00	28	63.5	20.4
203	2016-01-28 04:00:00	27.5	63.5	20
204	2016-01-28 05:00:00	27.5	63.5	20
205	2016-01-28 06:00:00	27	63.5	19.5
206	2016-01-28 07:00:00	27	63	19.4
207	2016-01-28 08:00:00	27	64.5	19.7
208	2016-01-28 09:00:00	26.5	65.5	19.5
209	2016-01-28 10:00:00	26.5	66	19.6
210	2016-01-28 11:00:00	26.5	66.5	19.7
211	2016-01-28 12:00:00	26.5	65.5	19.5
212	2016-01-28 13:00:00	26.5	65	19.4
213	2016-01-28 14:00:00	26.5	64	19.1
214	2016-01-28 15:00:00	27	63.5	19.5
215	2016-01-28 16:00:00	27.5	63	19.8
216	2016-01-28 17:00:00	27	62.5	19.2
217	2016-01-28 18:00:00	27.5	63	19.8
218	2016-01-28 19:00:00	27	63.5	19.5
219	2016-01-28 20:00:00	27	64.5	19.7
220	2016-01-28 21:00:00	26.5	65.5	19.5
221	2016-01-28 22:00:00	26	65.5	19
222	2016-01-28 23:00:00	26	65.5	19
223	2016-01-29	26	65.5	19
224	2016-01-29 01:00:00	26	65.5	19
225	2016-01-29 02:00:00	26	65.5	19
226	2016-01-29 03:00:00	25.5	66	18.7
227	2016-01-29 04:00:00	25.5	66	18.7
228	2016-01-29 05:00:00	25.5	66.5	18.8
229	2016-01-29 06:00:00	25.5	66.5	18.8
230	2016-01-29 07:00:00	25.5	67	18.9
231	2016-01-29 08:00:00	25	68.5	18.8
232	2016-01-29 09:00:00	25.5	68	19.2
233	2016-01-29 10:00:00	26	68.5	19.8
234	2016-01-29 11:00:00	27	67.5	20.5
235	2016-01-29 12:00:00	27.5	65.5	20.5
236	2016-01-29 13:00:00	28.5	63	20.8
237	2016-01-29 14:00:00	29	61.5	20.8
238	2016-01-29 15:00:00	30	59	21.1
239	2016-01-29 16:00:00	30.5	58	21.3
240	2016-01-29 17:00:00	30.5	58	21.3
241	2016-01-29 18:00:00	30	58	20.8
242	2016-01-29 19:00:00	29	59.5	20.3
243	2016-01-29 20:00:00	28.5	60.5	20.1
244	2016-01-29 21:00:00	28	61	19.8
245	2016-01-29 22:00:00	28	61.5	19.9
246	2016-01-29 23:00:00	27.5	61.5	19.4
247	2016-01-30	27.5	62	19.6
248	2016-01-30 01:00:00	27	63	19.4
249	2016-01-30 02:00:00	27	64	19.6
250	2016-01-30 03:00:00	27	64.5	19.7
251	2016-01-30 04:00:00	26.5	65	19.4
252	2016-01-30 05:00:00	26.5	65.5	19.5
253	2016-01-30 06:00:00	26.5	65.5	19.5
254	2016-01-30 07:00:00	26	66	19.2
255	2016-01-30 08:00:00	26	66	19.2
256	2016-01-30 09:00:00	26	66.5	19.3
257	2016-01-30 10:00:00	26	66.5	19.3
258	2016-01-30 11:00:00	26.5	66	19.6
259	2016-01-30 12:00:00	27	65	19.9
260	2016-01-30 13:00:00	27.5	64.5	20.2
261	2016-01-30 14:00:00	28.5	63	20.8
262	2016-01-30 15:00:00	29	61	20.7
263	2016-01-30 16:00:00	27	62.5	19.2
264	2016-01-30 17:00:00	26	63.5	18.5
265	2016-01-30 18:00:00	26	64.5	18.8
266	2016-01-30 19:00:00	26	65.5	19
267	2016-01-30 20:00:00	25.5	66	18.7
268	2016-01-30 21:00:00	25.5	66.5	18.8
269	2016-01-30 22:00:00	25.5	67	18.9
270	2016-01-30 23:00:00	25	67	18.4
271	2016-01-31	25	67.5	18.6
272	2016-01-31 01:00:00	25	67.5	18.6
273	2016-01-31 02:00:00	25	67.5	18.6
274	2016-01-31 03:00:00	25	67.5	18.6
275	2016-01-31 04:00:00	24.5	68	18.2
276	2016-01-31 05:00:00	24.5	68	18.2
277	2016-01-31 06:00:00	24.5	68.5	18.3
278	2016-01-31 07:00:00	24.5	68.5	18.3
279	2016-01-31 08:00:00	24.5	69	18.4
280	2016-01-31 09:00:00	24.5	70	18.7
281	2016-01-31 10:00:00	25	70	19.1
282	2016-01-31 11:00:00	25.5	71	19.9
283	2016-01-31 12:00:00	27	71	21.3
284	2016-01-31 13:00:00	27.5	68	21.1
285	2016-01-31 14:00:00	28	65.5	20.9
286	2016-01-31 15:00:00	28.5	65	21.3
287	2016-01-31 16:00:00	29	64	21.5
288	2016-01-31 17:00:00	28.5	65	21.3
289	2016-01-31 18:00:00	28	66	21.1
290	2016-01-31 19:00:00	27.5	67	20.8
291	2016-01-31 20:00:00	27.5	67.5	20.9
292	2016-01-31 21:00:00	27	67.5	20.5
293	2016-01-31 22:00:00	27	68	20.6
294	2016-01-31 23:00:00	27	68.5	20.7
295	2016-02-01	27	68.5	20.7
296	2016-02-01 01:00:00	27	69	20.8
297	2016-02-01 02:00:00	26.5	69	20.3
298	2016-02-01 03:00:00	26.5	69.5	20.5
299	2016-02-01 04:00:00	26.5	69.5	20.5
300	2016-02-01 05:00:00	26.5	70	20.6
301	2016-02-01 06:00:00	26.5	70	20.6
302	2016-02-01 07:00:00	26	70	20.1
303	2016-02-01 08:00:00	25.5	71	19.9
304	2016-02-01 09:00:00	25.5	70	19.6
305	2016-02-01 10:00:00	24.5	70	18.7
306	2016-02-01 11:00:00	24.5	71	18.9
307	2016-02-01 12:00:00	25	70.5	19.3
308	2016-02-01 13:00:00	25.5	70	19.6
309	2016-02-01 14:00:00	26	70	20.1
310	2016-02-01 15:00:00	26.5	69	20.3
311	2016-02-01 16:00:00	27	68	20.6
312	2016-02-01 17:00:00	27.5	67.5	20.9
313	2016-02-01 18:00:00	27.5	66.5	20.7
314	2016-02-01 19:00:00	26.5	65.5	19.5
315	2016-02-01 20:00:00	26.5	67.5	20
316	2016-02-01 21:00:00	26.5	67.5	20
317	2016-02-01 22:00:00	26.5	68	20.1
318	2016-02-01 23:00:00	26.5	69	20.3
319	2016-02-02	26.5	69	20.3
320	2016-02-02 01:00:00	26	69	19.9
321	2016-02-02 02:00:00	26	69	19.9
322	2016-02-02 03:00:00	26	69.5	20
323	2016-02-02 04:00:00	26	69.5	20
324	2016-02-02 05:00:00	25.5	69.5	19.5
325	2016-02-02 06:00:00	25.5	69.5	19.5
326	2016-02-02 07:00:00	25.5	70	19.6
327	2016-02-02 08:00:00	25.5	70.5	19.7
328	2016-02-02 09:00:00	25	71	19.4
329	2016-02-02 10:00:00	25.5	71	19.9
330	2016-02-02 11:00:00	26	71	20.3
331	2016-02-02 12:00:00	27	71	21.3
332	2016-02-02 13:00:00	27.5	69	21.3
333	2016-02-02 14:00:00	28	69.5	21.9
334	2016-02-02 15:00:00	26.5	68.5	20.2
335	2016-02-02 16:00:00	27	68	20.6
336	2016-02-02 17:00:00	27.5	67.5	20.9
337	2016-02-02 18:00:00	27.5	68	21.1
338	2016-02-02 19:00:00	26.5	66	19.6
339	2016-02-02 20:00:00	26.5	67.5	20
340	2016-02-02 21:00:00	26.5	67.5	20
341	2016-02-02 22:00:00	26.5	68.5	20.2
342	2016-02-02 23:00:00	26.5	68.5	20.2
343	2016-02-03	26	68.5	19.8
344	2016-02-03 01:00:00	26	69	19.9
345	2016-02-03 02:00:00	26	69	19.9
346	2016-02-03 03:00:00	25.5	69	19.4
347	2016-02-03 04:00:00	25.5	69.5	19.5
348	2016-02-03 05:00:00	25.5	69.5	19.5
349	2016-02-03 06:00:00	25	69.5	19
350	2016-02-03 07:00:00	25	69.5	19
351	2016-02-03 08:00:00	25	69.5	19
352	2016-02-03 09:00:00	25	70	19.1
353	2016-02-03 10:00:00	26	71	20.3
354	2016-02-03 11:00:00	27	70	21.1
355	2016-02-03 12:00:00	27.5	69	21.3
356	2016-02-03 13:00:00	28	68.5	21.7
357	2016-02-03 14:00:00	28	67.5	21.4
358	2016-02-03 15:00:00	28.5	67	21.8
359	2016-02-03 16:00:00	29	66.5	22.1
360	2016-02-03 17:00:00	29	65	21.7
361	2016-02-03 18:00:00	29	66	22
362	2016-02-03 19:00:00	29	66	22
363	2016-02-03 20:00:00	28.5	66.5	21.6
364	2016-02-03 21:00:00	28.5	67	21.8
365	2016-02-03 22:00:00	28	67.5	21.4
366	2016-02-03 23:00:00	28	68	21.5
367	2016-02-04	28	68.5	21.7
368	2016-02-04 01:00:00	27.5	68.5	21.2
369	2016-02-04 02:00:00	27.5	68.5	21.2
370	2016-02-04 03:00:00	27	68.5	20.7
371	2016-02-04 04:00:00	27	69	20.8
372	2016-02-04 05:00:00	27	69	20.8
373	2016-02-04 06:00:00	26.5	69	20.3
374	2016-02-04 07:00:00	26.5	69	20.3
375	2016-02-04 08:00:00	26.5	69.5	20.5
376	2016-02-04 09:00:00	27	69.5	20.9
377	2016-02-04 10:00:00	27.5	68.5	21.2
378	2016-02-04 11:00:00	28.5	66.5	21.6
379	2016-02-04 12:00:00	29	64	21.5
380	2016-02-04 13:00:00	30	61	21.7
381	2016-02-04 14:00:00	30.5	58.5	21.4
382	2016-02-04 15:00:00	31	59	22
383	2016-02-04 16:00:00	30.5	58.5	21.4
384	2016-02-04 17:00:00	28	64	20.6
385	2016-02-04 18:00:00	28	64	20.6
386	2016-02-04 19:00:00	27.5	66.5	20.7
387	2016-02-04 20:00:00	28	67	21.3
388	2016-02-04 21:00:00	28	67	21.3
389	2016-02-04 22:00:00	27.5	67	20.8
390	2016-02-04 23:00:00	27.5	67	20.8
391	2016-02-05	27.5	67.5	20.9
392	2016-02-05 01:00:00	27	68	20.6
393	2016-02-05 02:00:00	27	68	20.6
394	2016-02-05 03:00:00	26.5	68	20.1
395	2016-02-05 04:00:00	26.5	68	20.1
396	2016-02-05 05:00:00	26.5	68.5	20.2
397	2016-02-05 06:00:00	26	69	19.9
398	2016-02-05 07:00:00	26	69	19.9
399	2016-02-05 08:00:00	25.5	70	19.6
400	2016-02-05 09:00:00	26.5	69.5	20.5
401	2016-02-05 10:00:00	27.5	69.5	21.4
402	2016-02-05 11:00:00	28	68.5	21.7
403	2016-02-05 12:00:00	29	66.5	22.1
404	2016-02-05 13:00:00	30	63	22.2
405	2016-02-05 14:00:00	31	61.5	22.7
406	2016-02-05 15:00:00	32	58.5	22.8
407	2016-02-05 16:00:00	32	58	22.7
408	2016-02-05 17:00:00	30.5	57.5	21.2
409	2016-02-05 18:00:00	29.5	58	20.4
410	2016-02-05 19:00:00	29	62	21
411	2016-02-05 20:00:00	28.5	63.5	20.9
412	2016-02-05 21:00:00	28.5	64.5	21.1
413	2016-02-05 22:00:00	28.5	65.5	21.4
414	2016-02-05 23:00:00	28	66	21.1
415	2016-02-06	28	66.5	21.2
416	2016-02-06 01:00:00	28	67	21.3
417	2016-02-06 02:00:00	27.5	67	20.8
418	2016-02-06 03:00:00	27.5	67.5	20.9
419	2016-02-06 04:00:00	27	68	20.6
420	2016-02-06 05:00:00	27	68	20.6
421	2016-02-06 06:00:00	27	68	20.6
422	2016-02-06 07:00:00	26.5	68.5	20.2
423	2016-02-06 08:00:00	26.5	69	20.3
424	2016-02-06 09:00:00	26.5	69	20.3
425	2016-02-06 10:00:00	27	69.5	20.9
426	2016-02-06 11:00:00	27.5	68.5	21.2
427	2016-02-06 12:00:00	28	69.5	21.9
428	2016-02-06 13:00:00	29	68.5	22.6
429	2016-02-06 14:00:00	30	62	21.9
430	2016-02-06 15:00:00	30.5	61	22.1
431	2016-02-06 16:00:00	31	55.5	21
432	2016-02-06 17:00:00	31	57.5	21.6
433	2016-02-06 18:00:00	30	57	20.5
434	2016-02-06 19:00:00	29	62.5	21.1
435	2016-02-06 20:00:00	28.5	61.5	20.4
436	2016-02-06 21:00:00	28	63.5	20.4
437	2016-02-06 22:00:00	28	64	20.6
438	2016-02-06 23:00:00	28	64	20.6
439	2016-02-07	28	65	20.8
440	2016-02-07 01:00:00	28	65.5	20.9
441	2016-02-07 02:00:00	27.5	66	20.6
442	2016-02-07 03:00:00	27.5	66.5	20.7
443	2016-02-07 04:00:00	27.5	67	20.8
444	2016-02-07 05:00:00	27.5	67.5	20.9
445	2016-02-07 06:00:00	27	67	20.3
446	2016-02-07 07:00:00	27	68	20.6
447	2016-02-07 08:00:00	26.5	68	20.1
448	2016-02-07 09:00:00	26.5	67.5	20
449	2016-02-07 10:00:00	27	68	20.6
450	2016-02-07 11:00:00	27.5	67.5	20.9
451	2016-02-07 12:00:00	28	67	21.3
452	2016-02-07 13:00:00	29	65.5	21.9
453	2016-02-07 14:00:00	30	64	22.4
454	2016-02-07 15:00:00	30.5	59.5	21.7
455	2016-02-07 16:00:00	29.5	60.5	21
456	2016-02-07 17:00:00	29.5	60.5	21
457	2016-02-07 18:00:00	29.5	60.5	21
458	2016-02-07 19:00:00	29.5	63	21.7
459	2016-02-07 20:00:00	29.5	64	22
460	2016-02-07 21:00:00	29	64	21.5
461	2016-02-07 22:00:00	29	65.5	21.9
462	2016-02-07 23:00:00	28.5	65	21.3
463	2016-02-08	28.5	65.5	21.4
464	2016-02-08 01:00:00	28	65.5	20.9
465	2016-02-08 02:00:00	28	66.5	21.2
466	2016-02-08 03:00:00	27.5	66.5	20.7
467	2016-02-08 04:00:00	27.5	65.5	20.5
468	2016-02-08 05:00:00	27	65.5	20
469	2016-02-08 06:00:00	26.5	66.5	19.7
470	2016-02-08 07:00:00	26.5	66.5	19.7
471	2016-02-08 08:00:00	26	67.5	19.5
472	2016-02-08 09:00:00	26	68	19.6
473	2016-02-08 10:00:00	26.5	68	20.1
474	2016-02-08 11:00:00	27.5	68	21.1
475	2016-02-08 12:00:00	28	65.5	20.9
476	2016-02-08 13:00:00	28.5	64.5	21.1
477	2016-02-08 14:00:00	29	65.5	21.9
478	2016-02-08 15:00:00	29.5	64	22
479	2016-02-08 16:00:00	30	62	21.9
480	2016-02-08 17:00:00	31	61.5	22.7
481	2016-02-08 18:00:00	31	61.5	22.7
482	2016-02-08 19:00:00	30.5	65.5	23.3
483	2016-02-08 20:00:00	30	67.5	23.3
484	2016-02-08 21:00:00	27	65	19.9
485	2016-02-08 22:00:00	27	66.5	20.2
486	2016-02-08 23:00:00	27	66	20.1
487	2016-02-09	27	67	20.3
488	2016-02-09 01:00:00	27	67.5	20.5
489	2016-02-09 02:00:00	27	68	20.6
490	2016-02-09 03:00:00	26.5	68.5	20.2
491	2016-02-09 04:00:00	26.5	69.5	20.5
492	2016-02-09 05:00:00	26.5	69	20.3
493	2016-02-09 06:00:00	26	69.5	20
494	2016-02-09 07:00:00	26	70	20.1
495	2016-02-09 08:00:00	25.5	70	19.6
496	2016-02-09 09:00:00	25.5	71	19.9
497	2016-02-09 10:00:00	26	70	20.1
498	2016-02-09 11:00:00	26.5	70	20.6
499	2016-02-09 12:00:00	27.5	71	21.8
500	2016-02-09 13:00:00	28.5	68	22
501	2016-02-09 14:00:00	29.5	67	22.7
502	2016-02-09 15:00:00	29.5	62.5	21.6
503	2016-02-09 16:00:00	29.5	61	21.2
504	2016-02-09 17:00:00	30	61.5	21.8
505	2016-02-09 18:00:00	29.5	60.5	21
506	2016-02-09 19:00:00	29	63.5	21.4
507	2016-02-09 20:00:00	28	65	20.8
508	2016-02-09 21:00:00	28	67.5	21.4
509	2016-02-09 22:00:00	28	68	21.5
510	2016-02-09 23:00:00	27.5	69	21.3
511	2016-02-10	27.5	69.5	21.4
512	2016-02-10 01:00:00	27.5	70	21.5
513	2016-02-10 02:00:00	27.5	70.5	21.7
514	2016-02-10 03:00:00	27	71	21.3
515	2016-02-10 04:00:00	27	70	21.1
516	2016-02-10 05:00:00	26.5	70.5	20.7
517	2016-02-10 06:00:00	26.5	71	20.8
518	2016-02-10 07:00:00	26.5	71.5	20.9
519	2016-02-10 08:00:00	26.5	72.5	21.1
520	2016-02-10 09:00:00	26.5	72.5	21.1
521	2016-02-10 10:00:00	26.5	71.5	20.9
522	2016-02-10 11:00:00	27.5	71.5	21.9
523	2016-02-10 12:00:00	27.5	70	21.5
524	2016-02-10 13:00:00	26.5	72.5	21.1
525	2016-02-10 14:00:00	26.5	71	20.8
526	2016-02-10 15:00:00	27	69	20.8
527	2016-02-10 16:00:00	27.5	70	21.5
528	2016-02-10 17:00:00	28	69.5	21.9
529	2016-02-10 18:00:00	27.5	70.5	21.7
530	2016-02-10 19:00:00	27.5	71	21.8
531	2016-02-10 20:00:00	27	71.5	21.4
532	2016-02-10 21:00:00	27	71.5	21.4
533	2016-02-10 22:00:00	26.5	72.5	21.1
534	2016-02-10 23:00:00	26.5	72.5	21.1
535	2016-02-11	26.5	72	21
536	2016-02-11 01:00:00	26	72	20.6
537	2016-02-11 02:00:00	26	72.5	20.7
538	2016-02-11 03:00:00	26	73	20.8
539	2016-02-11 04:00:00	26	73.5	20.9
540	2016-02-11 05:00:00	25.5	73.5	20.4
541	2016-02-11 06:00:00	25.5	74	20.5
542	2016-02-11 07:00:00	25.5	74.5	20.6
543	2016-02-11 08:00:00	25.5	76	21
544	2016-02-11 09:00:00	26	75.5	21.3
545	2016-02-11 10:00:00	26	74.5	21.1
546	2016-02-11 11:00:00	25	67.5	18.6
547	2016-02-11 12:00:00	24	70.5	18.3
548	2016-02-11 13:00:00	24	71	18.4
549	2016-02-11 14:00:00	24	71	18.4
550	2016-02-11 15:00:00	24	72.5	18.7
551	2016-02-11 16:00:00	24	73.5	19
552	2016-02-11 17:00:00	24.5	73.5	19.4
553	2016-02-11 18:00:00	24.5	73.5	19.4
554	2016-02-11 19:00:00	24.5	74	19.6
555	2016-02-11 20:00:00	24.5	75	19.8
556	2016-02-11 21:00:00	24.5	74.5	19.7
557	2016-02-11 22:00:00	24.5	75	19.8
558	2016-02-11 23:00:00	24.5	75	19.8
559	2016-02-12	24	75.5	19.4
560	2016-02-12 01:00:00	24	75.5	19.4
561	2016-02-12 02:00:00	24	76	19.5
562	2016-02-12 03:00:00	24	75.5	19.4
563	2016-02-12 04:00:00	24	76	19.5
564	2016-02-12 05:00:00	24	76	19.5
565	2016-02-12 06:00:00	23.5	76	19
566	2016-02-12 07:00:00	23.5	76	19
567	2016-02-12 08:00:00	23.5	76.5	19.1
568	2016-02-12 09:00:00	24	76.5	19.6
569	2016-02-12 10:00:00	24	77	19.7
570	2016-02-12 11:00:00	25	76	20.5
571	2016-02-12 12:00:00	25.5	75.5	20.8
572	2016-02-12 13:00:00	26.5	68.5	20.2
573	2016-02-12 14:00:00	28	69	21.8
574	2016-02-12 15:00:00	28.5	62.5	20.6
575	2016-02-12 16:00:00	29.5	62.5	21.6
576	2016-02-12 17:00:00	29.5	64.5	22.1
577	2016-02-12 18:00:00	29	65	21.7
578	2016-02-12 19:00:00	29	69	22.7
579	2016-02-12 20:00:00	29	71.5	23.3
580	2016-02-12 21:00:00	28.5	71.5	22.8
581	2016-02-12 22:00:00	28.5	72	23
582	2016-02-12 23:00:00	28	72	22.5
583	2016-02-13	27.5	72	22
584	2016-02-13 01:00:00	27.5	72.5	22.1
585	2016-02-13 02:00:00	27	72.5	21.6
586	2016-02-13 03:00:00	27	72	21.5
587	2016-02-13 04:00:00	26.5	72	21
588	2016-02-13 05:00:00	26.5	72	21
589	2016-02-13 06:00:00	26.5	72.5	21.1
590	2016-02-13 07:00:00	26	72.5	20.7
591	2016-02-13 08:00:00	26	73.5	20.9
592	2016-02-13 09:00:00	26.5	73	21.3
593	2016-02-13 10:00:00	26.5	72	21
594	2016-02-13 11:00:00	27	71	21.3
595	2016-02-13 12:00:00	27.5	68.5	21.2
596	2016-02-13 13:00:00	29	64.5	21.6
597	2016-02-13 14:00:00	29.5	60	20.9
598	2016-02-13 15:00:00	30.5	60	21.8
599	2016-02-13 16:00:00	31	58	21.8
600	2016-02-13 17:00:00	31.5	56	21.7
601	2016-02-13 18:00:00	30.5	58	21.3
602	2016-02-13 19:00:00	29.5	61.5	21.3
603	2016-02-13 20:00:00	28.5	64	21
604	2016-02-13 21:00:00	28.5	65	21.3
605	2016-02-13 22:00:00	27.5	63	19.8
606	2016-02-13 23:00:00	27	64	19.6
607	2016-02-14	27	65.5	20
608	2016-02-14 01:00:00	27	66.5	20.2
609	2016-02-14 02:00:00	26.5	67.5	20
610	2016-02-14 03:00:00	26.5	68	20.1
611	2016-02-14 04:00:00	26	68.5	19.8
612	2016-02-14 05:00:00	26	69	19.9
613	2016-02-14 06:00:00	26	70	20.1
614	2016-02-14 07:00:00	25.5	70	19.6
615	2016-02-14 08:00:00	25.5	71	19.9
616	2016-02-14 09:00:00	26	71	20.3
617	2016-02-14 10:00:00	26.5	69.5	20.5
618	2016-02-14 11:00:00	27	67.5	20.5
619	2016-02-14 12:00:00	28	68	21.5
620	2016-02-14 13:00:00	29	66.5	22.1
621	2016-02-14 14:00:00	29	63.5	21.4
622	2016-02-14 15:00:00	30	60.5	21.5
623	2016-02-14 16:00:00	30.5	59.5	21.7
624	2016-02-14 17:00:00	31	58.5	21.9
625	2016-02-14 18:00:00	31	57.5	21.6
626	2016-02-14 19:00:00	30.5	61	22.1
627	2016-02-14 20:00:00	30	64	22.4
628	2016-02-14 21:00:00	30	64.5	22.6
629	2016-02-14 22:00:00	29.5	65	22.2
630	2016-02-14 23:00:00	29	66	22
631	2016-02-15	29	66.5	22.1
632	2016-02-15 01:00:00	28.5	67	21.8
633	2016-02-15 02:00:00	28.5	67	21.8
634	2016-02-15 03:00:00	28	67.5	21.4
635	2016-02-15 04:00:00	27.5	68	21.1
636	2016-02-15 05:00:00	27.5	68.5	21.2
637	2016-02-15 06:00:00	27.5	68.5	21.2
638	2016-02-15 07:00:00	27	69	20.8
639	2016-02-15 08:00:00	27.5	70	21.5
640	2016-02-15 09:00:00	27.5	69.5	21.4
641	2016-02-15 10:00:00	28	68	21.5
642	2016-02-15 11:00:00	29	65	21.7
643	2016-02-15 12:00:00	29.5	62	21.4
644	2016-02-15 13:00:00	30	59.5	21.2
645	2016-02-15 14:00:00	30.5	56.5	20.9
646	2016-02-15 15:00:00	31.5	54.5	21.2
647	2016-02-15 16:00:00	32	51	20.6
648	2016-02-15 17:00:00	32.5	52	21.4
649	2016-02-15 18:00:00	32	53.5	21.4
																									649

## Sheet: Kilosa-Temp
	Time	Celsius(°C)	Humidity(%rh)	Dew Point(°C)			Summary
1	2016-01-15 18:00:00	31.5	59.5	22.6				Temp	R.H	D.P
2	2016-01-15 19:00:00	30.5	63	22.7			Max	45	82.5	28.6
3	2016-01-15 20:00:00	30.5	64	22.9			Min	24.5	34	20
4	2016-01-15 21:00:00	30	65	22.7			Average	29.8	67.8	23
5	2016-01-15 22:00:00	29	66.5	22.1			S.D	3.7	9.6	1.3
6	2016-01-15 23:00:00	29	66.5	22.1
7	2016-01-16	28.5	67	21.8
8	2016-01-16 01:00:00	28.5	68	22
9	2016-01-16 02:00:00	28.5	68.5	22.1
10	2016-01-16 03:00:00	28	69	21.8
11	2016-01-16 04:00:00	27.5	69	21.3
12	2016-01-16 05:00:00	27.5	70	21.5
13	2016-01-16 06:00:00	27	71	21.3
14	2016-01-16 07:00:00	27	70.5	21.2
15	2016-01-16 08:00:00	28.5	67	21.8
16	2016-01-16 09:00:00	38	49.5	25.6
17	2016-01-16 10:00:00	45	37	26.9
18	2016-01-16 11:00:00	45	34	25.5
19	2016-01-16 12:00:00	36.5	44.5	22.4
20	2016-01-16 13:00:00	36	47	22.9
21	2016-01-16 14:00:00	35.5	47.5	22.6
22	2016-01-16 15:00:00	37	45	23.1
23	2016-01-16 16:00:00	37.5	44	23.2
24	2016-01-16 17:00:00	35	47.5	22.2
25	2016-01-16 18:00:00	32	60	23.3
26	2016-01-16 19:00:00	29	61	20.7
27	2016-01-16 20:00:00	30	66	22.9
28	2016-01-16 21:00:00	29.5	66	22.5
29	2016-01-16 22:00:00	28.5	66.5	21.6
30	2016-01-16 23:00:00	28.5	68.5	22.1
31	2016-01-17	28	69.5	21.9
32	2016-01-17 01:00:00	27.5	70.5	21.7
33	2016-01-17 02:00:00	27.5	71	21.8
34	2016-01-17 03:00:00	27	71.5	21.4
35	2016-01-17 04:00:00	26.5	72	21
36	2016-01-17 05:00:00	26.5	72	21
37	2016-01-17 06:00:00	26.5	72.5	21.1
38	2016-01-17 07:00:00	26.5	73.5	21.4
39	2016-01-17 08:00:00	27	73.5	21.9
40	2016-01-17 09:00:00	35.5	55	25.1
41	2016-01-17 10:00:00	37	50.5	25
42	2016-01-17 11:00:00	37.5	47	24.3
43	2016-01-17 12:00:00	35.5	49.5	23.3
44	2016-01-17 13:00:00	35.5	52	24.1
45	2016-01-17 14:00:00	36	50.5	24.1
46	2016-01-17 15:00:00	34	53.5	23.2
47	2016-01-17 16:00:00	34	53	23.1
48	2016-01-17 17:00:00	33.5	54	22.9
49	2016-01-17 18:00:00	33	58.5	23.8
50	2016-01-17 19:00:00	32.5	62	24.3
51	2016-01-17 20:00:00	30	61	21.7
52	2016-01-17 21:00:00	28.5	67	21.8
53	2016-01-17 22:00:00	28	69	21.8
54	2016-01-17 23:00:00	29	67	22.2
55	2016-01-18	29	67	22.2
56	2016-01-18 01:00:00	29	68	22.5
57	2016-01-18 02:00:00	28.5	69	22.3
58	2016-01-18 03:00:00	28	70	22
59	2016-01-18 04:00:00	27.5	70.5	21.7
60	2016-01-18 05:00:00	27.5	71.5	21.9
61	2016-01-18 06:00:00	27	72.5	21.6
62	2016-01-18 07:00:00	26.5	73.5	21.4
63	2016-01-18 08:00:00	27	72.5	21.6
64	2016-01-18 09:00:00	28.5	71	22.7
65	2016-01-18 10:00:00	38	51.5	26.3
66	2016-01-18 11:00:00	37	51	25.2
67	2016-01-18 12:00:00	34.5	54.5	24
68	2016-01-18 13:00:00	33.5	57.5	23.9
69	2016-01-18 14:00:00	33.5	56	23.5
70	2016-01-18 15:00:00	33.5	55.5	23.4
71	2016-01-18 16:00:00	33	56	23
72	2016-01-18 17:00:00	32.5	56.5	22.7
73	2016-01-18 18:00:00	31.5	59	22.5
74	2016-01-18 19:00:00	30.5	61.5	22.3
75	2016-01-18 20:00:00	30.5	63	22.7
76	2016-01-18 21:00:00	30	61	21.7
77	2016-01-18 22:00:00	29	63.5	21.4
78	2016-01-18 23:00:00	28.5	66	21.5
79	2016-01-19	28.5	66.5	21.6
80	2016-01-19 01:00:00	28	68	21.5
81	2016-01-19 02:00:00	28	69	21.8
82	2016-01-19 03:00:00	28	69.5	21.9
83	2016-01-19 04:00:00	27.5	70.5	21.7
84	2016-01-19 05:00:00	27.5	71	21.8
85	2016-01-19 06:00:00	27	72	21.5
86	2016-01-19 07:00:00	27	72.5	21.6
87	2016-01-19 08:00:00	28	71.5	22.4
88	2016-01-19 09:00:00	30.5	66.5	23.5
89	2016-01-19 10:00:00	37.5	51.5	25.8
90	2016-01-19 11:00:00	35.5	54.5	24.9
91	2016-01-19 12:00:00	32.5	60	23.7
92	2016-01-19 13:00:00	34	58	24.6
93	2016-01-19 14:00:00	34.5	57.5	24.9
94	2016-01-19 15:00:00	33	60.5	24.3
95	2016-01-19 16:00:00	33	60	24.2
96	2016-01-19 17:00:00	33	60.5	24.3
97	2016-01-19 18:00:00	32	64.5	24.5
98	2016-01-19 19:00:00	31	68	24.4
99	2016-01-19 20:00:00	30.5	69	24.2
100	2016-01-19 21:00:00	30	68	23.4
101	2016-01-19 22:00:00	28.5	71.5	22.8
102	2016-01-19 23:00:00	27.5	70.5	21.7
103	2016-01-20	27.5	71.5	21.9
104	2016-01-20 01:00:00	27	72	21.5
105	2016-01-20 02:00:00	27	73	21.7
106	2016-01-20 03:00:00	27	73	21.7
107	2016-01-20 04:00:00	27	73	21.7
108	2016-01-20 05:00:00	26.5	73.5	21.4
109	2016-01-20 06:00:00	26.5	74.5	21.6
110	2016-01-20 07:00:00	26	76	21.4
111	2016-01-20 08:00:00	26	76	21.4
112	2016-01-20 09:00:00	26.5	75.5	21.8
113	2016-01-20 10:00:00	27.5	74	22.4
114	2016-01-20 11:00:00	29	71	23.2
115	2016-01-20 12:00:00	30	69	23.7
116	2016-01-20 13:00:00	30.5	66.5	23.5
117	2016-01-20 14:00:00	30.5	65.5	23.3
118	2016-01-20 15:00:00	31	66	23.9
119	2016-01-20 16:00:00	31	65.5	23.8
120	2016-01-20 17:00:00	30	68.5	23.6
121	2016-01-20 18:00:00	29.5	69	23.2
122	2016-01-20 19:00:00	29	71	23.2
123	2016-01-20 20:00:00	28.5	73.5	23.3
124	2016-01-20 21:00:00	28	75	23.1
125	2016-01-20 22:00:00	28	76.5	23.5
126	2016-01-20 23:00:00	27.5	77.5	23.2
127	2016-01-21	27.5	77.5	23.2
128	2016-01-21 01:00:00	27.5	78	23.3
129	2016-01-21 02:00:00	27.5	78.5	23.4
130	2016-01-21 03:00:00	27	78.5	22.9
131	2016-01-21 04:00:00	26.5	78.5	22.5
132	2016-01-21 05:00:00	26.5	78	22.3
133	2016-01-21 06:00:00	26.5	78.5	22.5
134	2016-01-21 07:00:00	26.5	79.5	22.7
135	2016-01-21 08:00:00	27	78	22.8
136	2016-01-21 09:00:00	27	78.5	22.9
137	2016-01-21 10:00:00	27	79	23
138	2016-01-21 11:00:00	27.5	78.5	23.4
139	2016-01-21 12:00:00	27	80	23.3
140	2016-01-21 13:00:00	28	78	23.8
141	2016-01-21 14:00:00	28.5	76	23.9
142	2016-01-21 15:00:00	29	73.5	23.8
143	2016-01-21 16:00:00	29	75	24.1
144	2016-01-21 17:00:00	28.5	75.5	23.7
145	2016-01-21 18:00:00	28	76	23.4
146	2016-01-21 19:00:00	27.5	78	23.3
147	2016-01-21 20:00:00	27	79	23
148	2016-01-21 21:00:00	27	79.5	23.1
149	2016-01-21 22:00:00	26.5	80.5	22.9
150	2016-01-21 23:00:00	26.5	80.5	22.9
151	2016-01-22	26	81	22.5
152	2016-01-22 01:00:00	26	81	22.5
153	2016-01-22 02:00:00	26	81.5	22.6
154	2016-01-22 03:00:00	26	81	22.5
155	2016-01-22 04:00:00	25.5	81.5	22.1
156	2016-01-22 05:00:00	25.5	81.5	22.1
157	2016-01-22 06:00:00	25.5	81.5	22.1
158	2016-01-22 07:00:00	25.5	82.5	22.3
159	2016-01-22 08:00:00	26	82	22.7
160	2016-01-22 09:00:00	28	79	24
161	2016-01-22 10:00:00	41	49.5	28.3
162	2016-01-22 11:00:00	44.5	42	28.6
163	2016-01-22 12:00:00	34.5	56.5	24.6
164	2016-01-22 13:00:00	34.5	57.5	24.9
165	2016-01-22 14:00:00	35	56	24.9
166	2016-01-22 15:00:00	34.5	58.5	25.2
167	2016-01-22 16:00:00	35.5	57.5	25.8
168	2016-01-22 17:00:00	31	65	23.6
169	2016-01-22 18:00:00	31.5	66.5	24.5
170	2016-01-22 19:00:00	31	69	24.6
171	2016-01-22 20:00:00	30.5	70.5	24.5
172	2016-01-22 21:00:00	29	73.5	23.8
173	2016-01-22 22:00:00	28.5	74	23.4
174	2016-01-22 23:00:00	28	75	23.1
175	2016-01-23	27.5	75.5	22.8
176	2016-01-23 01:00:00	27.5	75	22.7
177	2016-01-23 02:00:00	27.5	74.5	22.6
178	2016-01-23 03:00:00	27.5	73.5	22.3
179	2016-01-23 04:00:00	27.5	74	22.4
180	2016-01-23 05:00:00	27	74.5	22.1
181	2016-01-23 06:00:00	26	76.5	21.5
182	2016-01-23 07:00:00	26.5	76.5	22
183	2016-01-23 08:00:00	27	76	22.4
184	2016-01-23 09:00:00	30.5	67	23.7
185	2016-01-23 10:00:00	30	68.5	23.6
186	2016-01-23 11:00:00	30	68	23.4
187	2016-01-23 12:00:00	32.5	64	24.8
188	2016-01-23 13:00:00	34	56.5	24.1
189	2016-01-23 14:00:00	34	57	24.3
190	2016-01-23 15:00:00	33	57	23.3
191	2016-01-23 16:00:00	34	56	24
192	2016-01-23 17:00:00	32.5	60	23.7
193	2016-01-23 18:00:00	31	65	23.6
194	2016-01-23 19:00:00	30.5	68.5	24
195	2016-01-23 20:00:00	30	69	23.7
196	2016-01-23 21:00:00	30	70.5	24
197	2016-01-23 22:00:00	29.5	71.5	23.8
198	2016-01-23 23:00:00	29	73	23.7
199	2016-01-24	28.5	72	23
200	2016-01-24 01:00:00	27.5	73.5	22.3
201	2016-01-24 02:00:00	27.5	74.5	22.6
202	2016-01-24 03:00:00	27	75	22.2
203	2016-01-24 04:00:00	27	75.5	22.3
204	2016-01-24 05:00:00	26.5	75.5	21.8
205	2016-01-24 06:00:00	26	76.5	21.5
206	2016-01-24 07:00:00	26	77.5	21.8
207	2016-01-24 08:00:00	27.5	75	22.7
208	2016-01-24 09:00:00	36	57	26.1
209	2016-01-24 10:00:00	43.5	42	27.7
210	2016-01-24 11:00:00	45	40	28.2
211	2016-01-24 12:00:00	37	50	24.8
212	2016-01-24 13:00:00	35.5	54.5	24.9
213	2016-01-24 14:00:00	35.5	56	25.4
214	2016-01-24 15:00:00	35	56.5	25
215	2016-01-24 16:00:00	35	56.5	25
216	2016-01-24 17:00:00	34.5	57	24.7
217	2016-01-24 18:00:00	33.5	60.5	24.8
218	2016-01-24 19:00:00	31	60	22.3
219	2016-01-24 20:00:00	29.5	61	21.2
220	2016-01-24 21:00:00	28.5	66.5	21.6
221	2016-01-24 22:00:00	28.5	68.5	22.1
222	2016-01-24 23:00:00	28.5	68	22
223	2016-01-25	28.5	69	22.3
224	2016-01-25 01:00:00	28	70	22
225	2016-01-25 02:00:00	27	71.5	21.4
226	2016-01-25 03:00:00	27	72	21.5
227	2016-01-25 04:00:00	27	72.5	21.6
228	2016-01-25 05:00:00	27	73	21.7
229	2016-01-25 06:00:00	26.5	73.5	21.4
230	2016-01-25 07:00:00	26	75.5	21.3
231	2016-01-25 08:00:00	28	71	22.2
232	2016-01-25 09:00:00	38	51	26.1
233	2016-01-25 10:00:00	34	55.5	23.8
234	2016-01-25 11:00:00	32.5	58	23.2
235	2016-01-25 12:00:00	33.5	56.5	23.7
236	2016-01-25 13:00:00	32.5	60.5	23.9
237	2016-01-25 14:00:00	33.5	60	24.7
238	2016-01-25 15:00:00	32	56	22.1
239	2016-01-25 16:00:00	33	56	23
240	2016-01-25 17:00:00	33.5	55	23.2
241	2016-01-25 18:00:00	32	56.5	22.3
242	2016-01-25 19:00:00	30.5	58	21.3
243	2016-01-25 20:00:00	27.5	63.5	20
244	2016-01-25 21:00:00	29	64	21.5
245	2016-01-25 22:00:00	29	65	21.7
246	2016-01-25 23:00:00	28.5	66	21.5
247	2016-01-26	28.5	65.5	21.4
248	2016-01-26 01:00:00	28	67	21.3
249	2016-01-26 02:00:00	27.5	68	21.1
250	2016-01-26 03:00:00	27.5	69.5	21.4
251	2016-01-26 04:00:00	27	70.5	21.2
252	2016-01-26 05:00:00	27	71.5	21.4
253	2016-01-26 06:00:00	26.5	72	21
254	2016-01-26 07:00:00	27	73.5	21.9
255	2016-01-26 08:00:00	28.5	67.5	21.9
256	2016-01-26 09:00:00	36	53.5	25.1
257	2016-01-26 10:00:00	42	41	26
258	2016-01-26 11:00:00	44	38.5	26.7
259	2016-01-26 12:00:00	37.5	46.5	24.1
260	2016-01-26 13:00:00	36	49	23.6
261	2016-01-26 14:00:00	36	49	23.6
262	2016-01-26 15:00:00	37	48	24.2
263	2016-01-26 16:00:00	37	46	23.4
264	2016-01-26 17:00:00	36	46.5	22.7
265	2016-01-26 18:00:00	35	50.5	23.2
266	2016-01-26 19:00:00	34	57.5	24.4
267	2016-01-26 20:00:00	33	57.5	23.5
268	2016-01-26 21:00:00	32	56.5	22.3
269	2016-01-26 22:00:00	32	58	22.7
270	2016-01-26 23:00:00	31	57	21.5
271	2016-01-27	31	60.5	22.5
272	2016-01-27 01:00:00	30.5	61.5	22.3
273	2016-01-27 02:00:00	30	62	21.9
274	2016-01-27 03:00:00	30	63.5	22.3
275	2016-01-27 04:00:00	29.5	65.5	22.3
276	2016-01-27 05:00:00	29	66.5	22.1
277	2016-01-27 06:00:00	29	68	22.5
278	2016-01-27 07:00:00	28.5	68.5	22.1
279	2016-01-27 08:00:00	30	64	22.4
280	2016-01-27 09:00:00	32	57.5	22.6
281	2016-01-27 10:00:00	42.5	38	25.2
282	2016-01-27 11:00:00	37.5	42.5	22.6
283	2016-01-27 12:00:00	35.5	45.5	21.9
284	2016-01-27 13:00:00	35.5	45.5	21.9
285	2016-01-27 14:00:00	36	45.5	22.4
286	2016-01-27 15:00:00	36	46.5	22.7
287	2016-01-27 16:00:00	35.5	46.5	22.3
288	2016-01-27 17:00:00	35	47	22
289	2016-01-27 18:00:00	34	50.5	22.3
290	2016-01-27 19:00:00	33	53	22.1
291	2016-01-27 20:00:00	32.5	56	22.6
292	2016-01-27 21:00:00	32	57	22.4
293	2016-01-27 22:00:00	31.5	59.5	22.6
294	2016-01-27 23:00:00	31	59.5	22.2
295	2016-01-28	30.5	61	22.1
296	2016-01-28 01:00:00	29.5	62	21.4
297	2016-01-28 02:00:00	30	62	21.9
298	2016-01-28 03:00:00	29.5	63.5	21.8
299	2016-01-28 04:00:00	29	66.5	22.1
300	2016-01-28 05:00:00	28.5	67.5	21.9
301	2016-01-28 06:00:00	28	67.5	21.4
302	2016-01-28 07:00:00	27.5	67.5	20.9
303	2016-01-28 08:00:00	27.5	69	21.3
304	2016-01-28 09:00:00	28	68	21.5
305	2016-01-28 10:00:00	27.5	72.5	22.1
306	2016-01-28 11:00:00	29	66.5	22.1
307	2016-01-28 12:00:00	28	69	21.8
308	2016-01-28 13:00:00	30.5	64	22.9
309	2016-01-28 14:00:00	31	60	22.3
310	2016-01-28 15:00:00	30	62	21.9
311	2016-01-28 16:00:00	30	62.5	22
312	2016-01-28 17:00:00	29.5	65.5	22.3
313	2016-01-28 18:00:00	29	66	22
314	2016-01-28 19:00:00	28.5	67.5	21.9
315	2016-01-28 20:00:00	28.5	69	22.3
316	2016-01-28 21:00:00	28	70.5	22.1
317	2016-01-28 22:00:00	27.5	72.5	22.1
318	2016-01-28 23:00:00	27.5	73	22.2
319	2016-01-29	27	73.5	21.9
320	2016-01-29 01:00:00	27	74.5	22.1
321	2016-01-29 02:00:00	26.5	75	21.7
322	2016-01-29 03:00:00	26.5	75	21.7
323	2016-01-29 04:00:00	26	75.5	21.3
324	2016-01-29 05:00:00	26	75	21.2
325	2016-01-29 06:00:00	26	75.5	21.3
326	2016-01-29 07:00:00	25.5	77	21.2
327	2016-01-29 08:00:00	27	75	22.2
328	2016-01-29 09:00:00	32.5	60.5	23.9
329	2016-01-29 10:00:00	36	53.5	25.1
330	2016-01-29 11:00:00	40.5	42	25.1
331	2016-01-29 12:00:00	35.5	52	24.1
332	2016-01-29 13:00:00	34.5	54.5	24
333	2016-01-29 14:00:00	35.5	51.5	24
334	2016-01-29 15:00:00	34.5	51	22.9
335	2016-01-29 16:00:00	33	54.5	22.6
336	2016-01-29 17:00:00	33	55	22.7
337	2016-01-29 18:00:00	32	60	23.3
338	2016-01-29 19:00:00	31	61	22.6
339	2016-01-29 20:00:00	30	63.5	22.3
340	2016-01-29 21:00:00	29.5	64	22
341	2016-01-29 22:00:00	29.5	65	22.2
342	2016-01-29 23:00:00	29.5	65.5	22.3
343	2016-01-30	28.5	69	22.3
344	2016-01-30 01:00:00	28	69.5	21.9
345	2016-01-30 02:00:00	27.5	70	21.5
346	2016-01-30 03:00:00	27.5	70	21.5
347	2016-01-30 04:00:00	27.5	70.5	21.7
348	2016-01-30 05:00:00	27	71.5	21.4
349	2016-01-30 06:00:00	27	72.5	21.6
350	2016-01-30 07:00:00	27	73	21.7
351	2016-01-30 08:00:00	27.5	73.5	22.3
352	2016-01-30 09:00:00	28.5	70	22.5
353	2016-01-30 10:00:00	30.5	65	23.2
354	2016-01-30 11:00:00	38.5	49.5	26
355	2016-01-30 12:00:00	35	54.5	24.4
356	2016-01-30 13:00:00	36	54	25.2
357	2016-01-30 14:00:00	33	58.5	23.8
358	2016-01-30 15:00:00	30.5	61.5	22.3
359	2016-01-30 16:00:00	29	68	22.5
360	2016-01-30 17:00:00	29	68	22.5
361	2016-01-30 18:00:00	28.5	70	22.5
362	2016-01-30 19:00:00	28	71	22.2
363	2016-01-30 20:00:00	27.5	72.5	22.1
364	2016-01-30 21:00:00	27	73.5	21.9
365	2016-01-30 22:00:00	26.5	74	21.5
366	2016-01-30 23:00:00	26.5	75	21.7
367	2016-01-31	26	75	21.2
368	2016-01-31 01:00:00	26	75.5	21.3
369	2016-01-31 02:00:00	25.5	76	21
370	2016-01-31 03:00:00	25.5	76	21
371	2016-01-31 04:00:00	25	76.5	20.6
372	2016-01-31 05:00:00	25	76.5	20.6
373	2016-01-31 06:00:00	25	77	20.7
374	2016-01-31 07:00:00	25	77.5	20.8
375	2016-01-31 08:00:00	27	75	22.2
376	2016-01-31 09:00:00	38	51	26.1
377	2016-01-31 10:00:00	35	51	23.3
378	2016-01-31 11:00:00	34	54	23.4
379	2016-01-31 12:00:00	34	55.5	23.8
380	2016-01-31 13:00:00	34.5	53.5	23.7
381	2016-01-31 14:00:00	33.5	56.5	23.7
382	2016-01-31 15:00:00	33.5	53	22.6
383	2016-01-31 16:00:00	32.5	58.5	23.3
384	2016-01-31 17:00:00	31.5	60.5	22.9
385	2016-01-31 18:00:00	30.5	63.5	22.8
386	2016-01-31 19:00:00	30.5	65	23.2
387	2016-01-31 20:00:00	30	66	22.9
388	2016-01-31 21:00:00	29.5	68	23
389	2016-01-31 22:00:00	28.5	70	22.5
390	2016-01-31 23:00:00	28.5	70.5	22.6
391	2016-02-01	28	71	22.2
392	2016-02-01 01:00:00	28	71	22.2
393	2016-02-01 02:00:00	27.5	71.5	21.9
394	2016-02-01 03:00:00	27	73	21.7
395	2016-02-01 04:00:00	27.5	72.5	22.1
396	2016-02-01 05:00:00	27	73.5	21.9
397	2016-02-01 06:00:00	27	74	22
398	2016-02-01 07:00:00	27	75	22.2
399	2016-02-01 08:00:00	27	75.5	22.3
400	2016-02-01 09:00:00	28	73.5	22.8
401	2016-02-01 10:00:00	31	66.5	24
402	2016-02-01 11:00:00	33.5	61.5	25.1
403	2016-02-01 12:00:00	30.5	66.5	23.5
404	2016-02-01 13:00:00	28	72	22.5
405	2016-02-01 14:00:00	28	73.5	22.8
406	2016-02-01 15:00:00	28.5	73	23.2
407	2016-02-01 16:00:00	28.5	74	23.4
408	2016-02-01 17:00:00	28	74.5	23
409	2016-02-01 18:00:00	27	75.5	22.3
410	2016-02-01 19:00:00	27	76	22.4
411	2016-02-01 20:00:00	26.5	77.5	22.2
412	2016-02-01 21:00:00	26	81	22.5
413	2016-02-01 22:00:00	26	80.5	22.4
414	2016-02-01 23:00:00	25.5	80.5	21.9
415	2016-02-02	25.5	80	21.8
416	2016-02-02 01:00:00	26	80	22.3
417	2016-02-02 02:00:00	25	82.5	21.8
418	2016-02-02 03:00:00	25	81	21.5
419	2016-02-02 04:00:00	25	81	21.5
420	2016-02-02 05:00:00	25	81	21.5
421	2016-02-02 06:00:00	24.5	81	21
422	2016-02-02 07:00:00	24.5	81	21
423	2016-02-02 08:00:00	24.5	81	21
424	2016-02-02 09:00:00	26	79	22.1
425	2016-02-02 10:00:00	35	60.5	26.2
426	2016-02-02 11:00:00	36	54.5	25.4
427	2016-02-02 12:00:00	34.5	57	24.7
428	2016-02-02 13:00:00	33.5	58	24.1
429	2016-02-02 14:00:00	33	59.5	24
430	2016-02-02 15:00:00	31	67	24.1
431	2016-02-02 16:00:00	32	64	24.3
432	2016-02-02 17:00:00	30.5	63.5	22.8
433	2016-02-02 18:00:00	28.5	68	22
434	2016-02-02 19:00:00	28	69	21.8
435	2016-02-02 20:00:00	27.5	71	21.8
436	2016-02-02 21:00:00	27.5	73.5	22.3
437	2016-02-02 22:00:00	27.5	73.5	22.3
438	2016-02-02 23:00:00	27	75	22.2
439	2016-02-03	27	75.5	22.3
440	2016-02-03 01:00:00	27	75.5	22.3
441	2016-02-03 02:00:00	26.5	76.5	22
442	2016-02-03 03:00:00	26	77	21.7
443	2016-02-03 04:00:00	26	77.5	21.8
444	2016-02-03 05:00:00	26	77	21.7
445	2016-02-03 06:00:00	25	78.5	21
446	2016-02-03 07:00:00	25	80	21.3
447	2016-02-03 08:00:00	26	78	21.9
448	2016-02-03 09:00:00	27.5	74	22.4
449	2016-02-03 10:00:00	31	67.5	24.3
450	2016-02-03 11:00:00	29.5	68	23
451	2016-02-03 12:00:00	30	67	23.2
452	2016-02-03 13:00:00	30.5	65.5	23.3
453	2016-02-03 14:00:00	31	65.5	23.8
454	2016-02-03 15:00:00	32.5	63.5	24.7
455	2016-02-03 16:00:00	33	62.5	24.9
456	2016-02-03 17:00:00	32	65	24.6
457	2016-02-03 18:00:00	30.5	67.5	23.8
458	2016-02-03 19:00:00	29.5	70	23.4
459	2016-02-03 20:00:00	29	71.5	23.3
460	2016-02-03 21:00:00	29	72.5	23.5
461	2016-02-03 22:00:00	29	74.5	24
462	2016-02-03 23:00:00	28.5	74.5	23.5
463	2016-02-04	28	75	23.1
464	2016-02-04 01:00:00	27	75	22.2
465	2016-02-04 02:00:00	27	75	22.2
466	2016-02-04 03:00:00	27	75	22.2
467	2016-02-04 04:00:00	27	75	22.2
468	2016-02-04 05:00:00	26.5	75.5	21.8
469	2016-02-04 06:00:00	26.5	76	21.9
470	2016-02-04 07:00:00	26	76	21.4
471	2016-02-04 08:00:00	26	76.5	21.5
472	2016-02-04 09:00:00	27.5	73.5	22.3
473	2016-02-04 10:00:00	29.5	68.5	23.1
474	2016-02-04 11:00:00	33.5	61.5	25.1
475	2016-02-04 12:00:00	33	60	24.2
476	2016-02-04 13:00:00	33	59.5	24
477	2016-02-04 14:00:00	34	58	24.6
478	2016-02-04 15:00:00	34.5	53.5	23.7
479	2016-02-04 16:00:00	35	56.5	25
480	2016-02-04 17:00:00	29.5	63.5	21.8
481	2016-02-04 18:00:00	29.5	67.5	22.8
482	2016-02-04 19:00:00	29	68	22.5
483	2016-02-04 20:00:00	28	71	22.2
484	2016-02-04 21:00:00	28.5	72.5	23.1
485	2016-02-04 22:00:00	28	75	23.1
486	2016-02-04 23:00:00	27.5	75.5	22.8
487	2016-02-05	27	76	22.4
488	2016-02-05 01:00:00	27	77	22.6
489	2016-02-05 02:00:00	27	77	22.6
490	2016-02-05 03:00:00	26.5	77	22.1
491	2016-02-05 04:00:00	26.5	77	22.1
492	2016-02-05 05:00:00	26.5	77.5	22.2
493	2016-02-05 06:00:00	26	78.5	22
494	2016-02-05 07:00:00	25.5	79.5	21.7
495	2016-02-05 08:00:00	27	76	22.4
496	2016-02-05 09:00:00	34	61	25.4
497	2016-02-05 10:00:00	44	41.5	28
498	2016-02-05 11:00:00	35.5	51.5	24
499	2016-02-05 12:00:00	35	55	24.6
500	2016-02-05 13:00:00	35	56.5	25
501	2016-02-05 14:00:00	34.5	57	24.7
502	2016-02-05 15:00:00	34	55	23.7
503	2016-02-05 16:00:00	33	59.5	24
504	2016-02-05 17:00:00	31.5	62	23.3
505	2016-02-05 18:00:00	31.5	64	23.9
506	2016-02-05 19:00:00	30	64	22.4
507	2016-02-05 20:00:00	28.5	68	22
508	2016-02-05 21:00:00	29	68	22.5
509	2016-02-05 22:00:00	29	68.5	22.6
510	2016-02-05 23:00:00	28.5	69	22.3
511	2016-02-06	28	70	22
512	2016-02-06 01:00:00	27.5	71	21.8
513	2016-02-06 02:00:00	27.5	72	22
514	2016-02-06 03:00:00	27	73	21.7
515	2016-02-06 04:00:00	27	73.5	21.9
516	2016-02-06 05:00:00	27	74	22
517	2016-02-06 06:00:00	27	74.5	22.1
518	2016-02-06 07:00:00	27	75	22.2
519	2016-02-06 08:00:00	27.5	75.5	22.8
520	2016-02-06 09:00:00	28	74	22.9
521	2016-02-06 10:00:00	39	52	27.3
522	2016-02-06 11:00:00	41.5	44.5	26.9
523	2016-02-06 12:00:00	34	56	24
524	2016-02-06 13:00:00	34.5	56	24.4
525	2016-02-06 14:00:00	35	57	25.2
526	2016-02-06 15:00:00	35	56	24.9
527	2016-02-06 16:00:00	35	56.5	25
528	2016-02-06 17:00:00	32.5	61.5	24.1
529	2016-02-06 18:00:00	32.5	65	25.1
530	2016-02-06 19:00:00	31	66.5	24
531	2016-02-06 20:00:00	30.5	68.5	24
532	2016-02-06 21:00:00	30	69	23.7
533	2016-02-06 22:00:00	30	70	23.9
534	2016-02-06 23:00:00	27.5	74	22.4
535	2016-02-07	27.5	70.5	21.7
536	2016-02-07 01:00:00	27.5	72.5	22.1
537	2016-02-07 02:00:00	27.5	73	22.2
538	2016-02-07 03:00:00	27	74.5	22.1
539	2016-02-07 04:00:00	26.5	75.5	21.8
540	2016-02-07 05:00:00	26.5	75.5	21.8
541	2016-02-07 06:00:00	26.5	76	21.9
542	2016-02-07 07:00:00	26.5	76	21.9
543	2016-02-07 08:00:00	26	77.5	21.8
544	2016-02-07 09:00:00	27.5	73.5	22.3
545	2016-02-07 10:00:00	28	73	22.7
546	2016-02-07 11:00:00	30.5	67.5	23.8
547	2016-02-07 12:00:00	32	64	24.3
548	2016-02-07 13:00:00	34	59	24.8
549	2016-02-07 14:00:00	33.5	58.5	24.2
550	2016-02-07 15:00:00	33	59.5	24
551	2016-02-07 16:00:00	31.5	62.5	23.5
552	2016-02-07 17:00:00	32	61.5	23.7
553	2016-02-07 18:00:00	31	67	24.1
554	2016-02-07 19:00:00	30	68.5	23.6
555	2016-02-07 20:00:00	29	68	22.5
556	2016-02-07 21:00:00	28.5	68	22
557	2016-02-07 22:00:00	28.5	69.5	22.4
558	2016-02-07 23:00:00	28	70.5	22.1
559	2016-02-08	28	71	22.2
560	2016-02-08 01:00:00	27	74.5	22.1
561	2016-02-08 02:00:00	27	73.5	21.9
562	2016-02-08 03:00:00	27	74.5	22.1
563	2016-02-08 04:00:00	26.5	75	21.7
564	2016-02-08 05:00:00	26.5	75.5	21.8
565	2016-02-08 06:00:00	26.5	76	21.9
566	2016-02-08 07:00:00	26.5	76	21.9
567	2016-02-08 08:00:00	27	76.5	22.5
568	2016-02-08 09:00:00	28	73	22.7
569	2016-02-08 10:00:00	30.5	67	23.7
570	2016-02-08 11:00:00	31	65	23.6
571	2016-02-08 12:00:00	35	56.5	25
572	2016-02-08 13:00:00	34.5	56.5	24.6
573	2016-02-08 14:00:00	32.5	62.5	24.4
574	2016-02-08 15:00:00	31.5	65.5	24.2
575	2016-02-08 16:00:00	32	63	24.1
576	2016-02-08 17:00:00	32	65.5	24.7
577	2016-02-08 18:00:00	31	68.5	24.5
578	2016-02-08 19:00:00	30	70.5	24
579	2016-02-08 20:00:00	29.5	73	24.1
580	2016-02-08 21:00:00	29.5	74.5	24.5
581	2016-02-08 22:00:00	27.5	73.5	22.3
582	2016-02-08 23:00:00	27	76	22.4
583	2016-02-09	26.5	77	22.1
584	2016-02-09 01:00:00	26.5	77.5	22.2
585	2016-02-09 02:00:00	26	77.5	21.8
586	2016-02-09 03:00:00	26	78	21.9
587	2016-02-09 04:00:00	25.5	78.5	21.5
588	2016-02-09 05:00:00	25.5	79	21.6
589	2016-02-09 06:00:00	25.5	80	21.8
590	2016-02-09 07:00:00	25	80.5	21.4
591	2016-02-09 08:00:00	25.5	80.5	21.9
592	2016-02-09 09:00:00	26	80	22.3
593	2016-02-09 10:00:00	27	77.5	22.7
594	2016-02-09 11:00:00	31	66	23.9
595	2016-02-09 12:00:00	32	62.5	23.9
596	2016-02-09 13:00:00	32.5	61.5	24.1
597	2016-02-09 14:00:00	32.5	61.5	24.1
598	2016-02-09 15:00:00	32	62.5	23.9
599	2016-02-09 16:00:00	32.5	63.5	24.7
600	2016-02-09 17:00:00	31.5	63	23.6
601	2016-02-09 18:00:00	30.5	68	23.9
602	2016-02-09 19:00:00	29.5	72.5	24
603	2016-02-09 20:00:00	29.5	73.5	24.3
604	2016-02-09 21:00:00	29	74.5	24
605	2016-02-09 22:00:00	28.5	76	23.9
606	2016-02-09 23:00:00	28.5	77.5	24.2
607	2016-02-10	28	77.5	23.7
608	2016-02-10 01:00:00	28	78	23.8
609	2016-02-10 02:00:00	27.5	78.5	23.4
610	2016-02-10 03:00:00	27.5	79	23.5
611	2016-02-10 04:00:00	27	79.5	23.1
612	2016-02-10 05:00:00	27	79.5	23.1
613	2016-02-10 06:00:00	27	79.5	23.1
614	2016-02-10 07:00:00	26	78.5	22
615	2016-02-10 08:00:00	25.5	80	21.8
616	2016-02-10 09:00:00	25	81.5	21.6
617	2016-02-10 10:00:00	26.5	77.5	22.2
618	2016-02-10 11:00:00	36	56	25.8
619	2016-02-10 12:00:00	33	62	24.7
620	2016-02-10 13:00:00	32	63.5	24.2
621	2016-02-10 14:00:00	31	65.5	23.8
622	2016-02-10 15:00:00	31.5	64.5	24
623	2016-02-10 16:00:00	31.5	66.5	24.5
624	2016-02-10 17:00:00	31	68	24.4
625	2016-02-10 18:00:00	30.5	69.5	24.3
626	2016-02-10 19:00:00	29	73.5	23.8
627	2016-02-10 20:00:00	28.5	76.5	24
628	2016-02-10 21:00:00	28.5	77.5	24.2
629	2016-02-10 22:00:00	28	79	24
630	2016-02-10 23:00:00	27.5	80	23.7
631	2016-02-11	27.5	80.5	23.8
632	2016-02-11 01:00:00	27.5	80.5	23.8
633	2016-02-11 02:00:00	27	81	23.5
634	2016-02-11 03:00:00	27	81	23.5
635	2016-02-11 04:00:00	26.5	81.5	23.1
636	2016-02-11 05:00:00	26.5	81.5	23.1
637	2016-02-11 06:00:00	26.5	81.5	23.1
638	2016-02-11 07:00:00	26.5	81.5	23.1
639	2016-02-11 08:00:00	27	81.5	23.6
640	2016-02-11 09:00:00	28	78.5	23.9
641	2016-02-11 10:00:00	33	65	25.5
642	2016-02-11 11:00:00	38.5	51.5	26.7
643	2016-02-11 12:00:00	33.5	61.5	25.1
644	2016-02-11 13:00:00	33.5	62	25.2
645	2016-02-11 14:00:00	28.5	68	22
646	2016-02-11 15:00:00	27.5	70.5	21.7
647	2016-02-11 16:00:00	27.5	68.5	21.2
648	2016-02-11 17:00:00	26.5	72	21
649	2016-02-11 18:00:00	26.5	71	20.8
650	2016-02-11 19:00:00	26.5	72	21
651	2016-02-11 20:00:00	26	75.5	21.3
652	2016-02-11 21:00:00	26	77	21.7
653	2016-02-11 22:00:00	25.5	77.5	21.3
654	2016-02-11 23:00:00	25.5	78	21.4
655	2016-02-12	25	79	21.1
656	2016-02-12 01:00:00	25	79	21.1
657	2016-02-12 02:00:00	25	79.5	21.2
658	2016-02-12 03:00:00	24.5	79.5	20.7
659	2016-02-12 04:00:00	24.5	80	20.8
660	2016-02-12 05:00:00	24.5	80	20.8
661	2016-02-12 06:00:00	24.5	80.5	20.9
662	2016-02-12 07:00:00	24.5	80.5	20.9
663	2016-02-12 08:00:00	27	76	22.4
664	2016-02-12 09:00:00	37	53	25.8
665	2016-02-12 10:00:00	41.5	42.5	26.2
666	2016-02-12 11:00:00	44	38.5	26.7
667	2016-02-12 12:00:00	35.5	52	24.1
668	2016-02-12 13:00:00	35	55	24.6
669	2016-02-12 14:00:00	34.5	52.5	23.4
670	2016-02-12 15:00:00	35	53	24
671	2016-02-12 16:00:00	34.5	53	23.5
672	2016-02-12 17:00:00	34	55	23.7
673	2016-02-12 18:00:00	32.5	59.5	23.6
674	2016-02-12 19:00:00	31	67.5	24.3
675	2016-02-12 20:00:00	30.5	70.5	24.5
676	2016-02-12 21:00:00	30	71	24.2
677	2016-02-12 22:00:00	29.5	72.5	24
678	2016-02-12 23:00:00	29.5	73	24.1
679	2016-02-13	28.5	76	23.9
680	2016-02-13 01:00:00	28.5	76	23.9
681	2016-02-13 02:00:00	27.5	76.5	23
682	2016-02-13 03:00:00	27.5	76	22.9
683	2016-02-13 04:00:00	27.5	77.5	23.2
684	2016-02-13 05:00:00	27.5	77.5	23.2
685	2016-02-13 06:00:00	27.5	78	23.3
686	2016-02-13 07:00:00	27	79	23
687	2016-02-13 08:00:00	27.5	78.5	23.4
688	2016-02-13 09:00:00	27	80.5	23.4
689	2016-02-13 10:00:00	27	80	23.3
690	2016-02-13 11:00:00	29.5	74.5	24.5
691	2016-02-13 12:00:00	29.5	71	23.7
692	2016-02-13 13:00:00	29	75	24.1
693	2016-02-13 14:00:00	29	75.5	24.2
694	2016-02-13 15:00:00	31.5	69	25.1
695	2016-02-13 16:00:00	31.5	65.5	24.2
696	2016-02-13 17:00:00	31	69.5	24.8
697	2016-02-13 18:00:00	31	71.5	25.2
698	2016-02-13 19:00:00	29.5	75	24.6
699	2016-02-13 20:00:00	29.5	76.5	24.9
700	2016-02-13 21:00:00	29	77	24.6
701	2016-02-13 22:00:00	26.5	82.5	23.3
702	2016-02-13 23:00:00	27	80	23.3
703	2016-02-14	27	78.5	22.9
704	2016-02-14 01:00:00	26.5	78.5	22.5
705	2016-02-14 02:00:00	26.5	78.5	22.5
706	2016-02-14 03:00:00	26	79	22.1
707	2016-02-14 04:00:00	26	79.5	22.2
708	2016-02-14 05:00:00	26	80	22.3
709	2016-02-14 06:00:00	25.5	80	21.8
710	2016-02-14 07:00:00	25.5	79.5	21.7
711	2016-02-14 08:00:00	26.5	78	22.3
712	2016-02-14 09:00:00	29	72.5	23.5
713	2016-02-14 10:00:00	30	71.5	24.3
714	2016-02-14 11:00:00	31.5	67.5	24.7
715	2016-02-14 12:00:00	32	66	24.8
716	2016-02-14 13:00:00	32.5	63.5	24.7
717	2016-02-14 14:00:00	33	59.5	24
718	2016-02-14 15:00:00	33	60.5	24.3
719	2016-02-14 16:00:00	33	61	24.5
720	2016-02-14 17:00:00	33.5	60	24.7
721	2016-02-14 18:00:00	31.5	62.5	23.5
722	2016-02-14 19:00:00	31	69	24.6
723	2016-02-14 20:00:00	30.5	72	24.9
724	2016-02-14 21:00:00	29.5	73	24.1
725	2016-02-14 22:00:00	29.5	72.5	24
726	2016-02-14 23:00:00	29	71	23.2
727	2016-02-15	28	72.5	22.6
728	2016-02-15 01:00:00	26.5	74	21.5
729	2016-02-15 02:00:00	26.5	74.5	21.6
730	2016-02-15 03:00:00	27	74.5	22.1
731	2016-02-15 04:00:00	27	74.5	22.1
732	2016-02-15 05:00:00	27	75	22.2
733	2016-02-15 06:00:00	26.5	75.5	21.8
734	2016-02-15 07:00:00	26.5	76.5	22
735	2016-02-15 08:00:00	26.5	76.5	22
736	2016-02-15 09:00:00	28	73	22.7
737	2016-02-15 10:00:00	30.5	68	23.9
738	2016-02-15 11:00:00	30	67.5	23.3
739	2016-02-15 12:00:00	33.5	58	24.1
740	2016-02-15 13:00:00	34	55	23.7
741	2016-02-15 14:00:00	34.5	55	24.1
742	2016-02-15 15:00:00	34.5	57.5	24.9
743	2016-02-15 16:00:00	34.5	62	26.1
744	2016-02-15 17:00:00	35.5	62	27.1
745	2016-02-15 18:00:00	34	59.5	25
																									745

## Sheet: Kilosa
		Data Collection-Kilosa Region											PERCENTAGE MORTALITY
		Farmer	Expt. Unit (container)	Initial ppn	1st month (Dec-15)		2nd month (Jan-16)		3rd month (Feb-16)
					Live	Dead	Live	Dead	Live	Dead
		Shomari	21	32	0	28							Farmer 1	1st month	2nd month	3rd month
			17	32	4	30								100	77.7778	100
			3	20	0	26								88.2353	71.4286	100
			C9	32	0	38								100	100	84.6154
			5	24			8	28					Treatment (%)	96.0784	83.0688	94.8718
			24	22			8	20					S.D	6.79236	15.0026	8.88231
			7	28			0	24					Control (%)	100	0	0
			C3	24			40	16
			23	18					0	32
			19	12					0	18			(%) mortality = (no. of dead insects/total no. of insects)*100
			13	16					4	22
			C5	20					96	20
		Mariamu	16	40	8	24
			27	20	0	32
			4	24	0	46
			C1	40	0	18							Farmer 2	Mortality (%)
			18	28			4	146						1st month	2nd month	3rd month
			25	20			8	28						75	97.3333	94.4444
			7	32			0	120						100	87.5	100
			C7	32			88	40						100	100	100
			9	44					4	68			Treatment (%)	91.6667	94.9444	98.1481
			20	24					0	20			S.D	14.4338	6.58351	3.2075
			15	18					0	16			Control (%)	100	0	0
			C4	16					160	16
		Rajabu	1	8	0	30
			22	4	0	12
			10	8	0	26							Farmer 3	Mortality (%)
			C2	12	4	42								1st month	2nd month	3rd month
			12	44			0	60						100	100	100
			6	20			8	20						100	71.4286	100
			26	28			0	24						100	100	100
			C8	20			20	8					Treatment (%)	100	90.4762	100
			14	12					0	12			S.D	0	16.4957	0
			2	20					0	18			Control (%)	33.3333	0	0
			11	14					0	12
			C6	32					102	36
													KILOSA SUMMARY
														Mortality (%)
														1st month	2nd month	3rd month
													Treatment (%)	95.915	89.4965	97.6733
													S.D	4.16907	5.99814	2.59687
													Control (%)	77.7778	0	0
														0	0

## Sheet: Babati
		Data Collection-Babati Region										PERCENTAGE MORTALITY
		Farmer	Expt. Unit (container)	Initial ppn	1st month		2nd month		3rd month
					Live	Dead	Live	Dead	Live	Dead
		Ismail	16	16	0	32						Farmer 1	1st month	2nd month	3rd month
			12	96	0	48							100	100	100
			26	44	0	72							100	95.6522	100
			C2	164	16	104	rep						100	100	98.0952
			5	112			0	72				Treatment (%)	100	98.5507	99.3651
			6	80			4	88				S.D	0	2.51022	1.09971
			21	12			0	84				Control(%)	37	0	0
			C7	40			120	28
			19	28					0	32
			24	140					0	180		(%) mortality = (no. of dead insects/total no. of insects)*100
			11	60					4	206
			C6	136					180	240
		Kassi	1	24	0	23
			8	8	4	48
			23	12	4	24
			C1	36	12	20							Mortality (%)
			15	20			0	56				Farmer 2	1st month	2nd month	3rd month
			27	12			0	48					100	100	100
			17	22			0	24					92.3077	100	100
			C4	56			32	0					85.7143	100	100
			3	12					0	24		Treatment (%)	92.674	100	100
			10	52					0	62		S.D	7.1499	0	0
			22	76					0	106		Control (%)	44	0	0
			C9	72					112	68
		Monica	14	24	0	24
			2	20	0	8
			18	24	0	8							Mortality (%)
			C8	24	8	12						Farmer 3	1st month	2nd month	3rd month
			4	32			0	100					100	100	100
			20	40			0	120					100	100	100
			7	40			0	80					100	100	100
			C5	124			80	24				Treatment (%)	100	100	100
			9	144					0	140		S.D	0	0	0
			25	144					0	184		Control(%)	50	19.3548	29
			13	120					4	132
			C3	152					165	108
												BABATI SUMMARY
													Mortality (%)
													1st month	2nd month	3rd month
												Treatment (%)	97.558	99.5169	99.7884
												S.D	4.22967	0.83674	0.366572
												Control(%)	43.6667	6.45161	9.66667
												OVERAL-TREATMENT- SUMMARY
													MORTALITY (%)
													1st month	2nd month	3rd month
												Dodoma	90.5343	95.198	99.3464
												Kilosa	95.915	89.4965	97.6733
												Babati	97.558	99.5169	99.7884
												OVERAL	94.6691	94.7371	98.936
												S.D	3.67388	5.02609	1.11564
												OVERAL-CONTROL-SUMMARY
													MORTALITY (%)
													1st month	2nd month	3rd month
												Dodoma	9.89744	8.33333	6.34921
												Kilosa	77.7778	0	0
												Babati	43.6667	6.45161	9.66667
												OVERAL	43.7806	4.92832	5.33862
												S.D	33.9403	4.37052	4.91193

## Sheet: Babati-Temp
	Time	Celsius(°C)	Humidity(%rh)	Dew Point(°C)			Summary
1	2016-01-18 18:00:00	27	67.5	20.5				Temp	R.H	D.P
2	2016-01-18 19:00:00	26.5	68.5	20.2			Max	35.5	81	25.2
3	2016-01-18 20:00:00	26.5	68.5	20.2			Min	20.5	38	15.4
4	2016-01-18 21:00:00	26.5	69	20.3			Average	26	64.3	18.6
5	2016-01-18 22:00:00	26.5	73	21.3			S.D	2.6	7.6	1.4
6	2016-01-18 23:00:00	26.5	70.5	20.7
7	2016-01-19	26.5	69.5	20.5
8	2016-01-19 01:00:00	26	69.5	20
9	2016-01-19 02:00:00	26	69	19.9
10	2016-01-19 03:00:00	26	69	19.9
11	2016-01-19 04:00:00	26	69	19.9
12	2016-01-19 05:00:00	25.5	70	19.6
13	2016-01-19 06:00:00	24.5	69	18.4
14	2016-01-19 07:00:00	24.5	71.5	19
15	2016-01-19 08:00:00	25	73	19.8
16	2016-01-19 09:00:00	24.5	71	18.9
17	2016-01-19 10:00:00	25	70.5	19.3
18	2016-01-19 11:00:00	25	69.5	19
19	2016-01-19 12:00:00	26	69.5	20
20	2016-01-19 13:00:00	32	61.5	23.7
21	2016-01-19 14:00:00	30	56.5	20.4
22	2016-01-19 15:00:00	28.5	66	21.5
23	2016-01-19 16:00:00	30	69	23.7
24	2016-01-19 17:00:00	28.5	61.5	20.4
25	2016-01-19 18:00:00	26.5	68	20.1
26	2016-01-19 19:00:00	26.5	68.5	20.2
27	2016-01-19 20:00:00	26	67.5	19.5
28	2016-01-19 21:00:00	26	68	19.6
29	2016-01-19 22:00:00	25.5	68.5	19.3
30	2016-01-19 23:00:00	25.5	68.5	19.3
31	2016-01-20	25	68.5	18.8
32	2016-01-20 01:00:00	25	69.5	19
33	2016-01-20 02:00:00	24.5	70.5	18.8
34	2016-01-20 03:00:00	24.5	71	18.9
35	2016-01-20 04:00:00	24	71.5	18.5
36	2016-01-20 05:00:00	24	71.5	18.5
37	2016-01-20 06:00:00	23.5	72	18.2
38	2016-01-20 07:00:00	23.5	72.5	18.3
39	2016-01-20 08:00:00	23.5	72.5	18.3
40	2016-01-20 09:00:00	23.5	73.5	18.5
41	2016-01-20 10:00:00	23.5	73.5	18.5
42	2016-01-20 11:00:00	23.5	73.5	18.5
43	2016-01-20 12:00:00	24	73.5	19
44	2016-01-20 13:00:00	24	73	18.9
45	2016-01-20 14:00:00	24.5	73	19.3
46	2016-01-20 15:00:00	25.5	72.5	20.2
47	2016-01-20 16:00:00	25.5	67.5	19
48	2016-01-20 17:00:00	25.5	67	18.9
49	2016-01-20 18:00:00	25.5	67	18.9
50	2016-01-20 19:00:00	25	67.5	18.6
51	2016-01-20 20:00:00	25	69	18.9
52	2016-01-20 21:00:00	24.5	69	18.4
53	2016-01-20 22:00:00	24.5	69	18.4
54	2016-01-20 23:00:00	24	69.5	18.1
55	2016-01-21	24	70	18.2
56	2016-01-21 01:00:00	23.5	71	17.9
57	2016-01-21 02:00:00	23.5	71.5	18
58	2016-01-21 03:00:00	23	71.5	17.6
59	2016-01-21 04:00:00	23	72.5	17.8
60	2016-01-21 05:00:00	23	73	17.9
61	2016-01-21 06:00:00	23	72.5	17.8
62	2016-01-21 07:00:00	22.5	73	17.4
63	2016-01-21 08:00:00	23	75	18.3
64	2016-01-21 09:00:00	23	75.5	18.4
65	2016-01-21 10:00:00	24	76.5	19.6
66	2016-01-21 11:00:00	25	72	19.6
67	2016-01-21 12:00:00	26.5	69	20.3
68	2016-01-21 13:00:00	27	66.5	20.2
69	2016-01-21 14:00:00	28	64.5	20.7
70	2016-01-21 15:00:00	28.5	64	21
71	2016-01-21 16:00:00	27.5	68	21.1
72	2016-01-21 17:00:00	26.5	69	20.3
73	2016-01-21 18:00:00	26.5	69	20.3
74	2016-01-21 19:00:00	26	68.5	19.8
75	2016-01-21 20:00:00	26	70	20.1
76	2016-01-21 21:00:00	25.5	70.5	19.7
77	2016-01-21 22:00:00	25.5	69.5	19.5
78	2016-01-21 23:00:00	25.5	69.5	19.5
79	2016-01-22	25	69.5	19
80	2016-01-22 01:00:00	25	70	19.1
81	2016-01-22 02:00:00	24.5	70.5	18.8
82	2016-01-22 03:00:00	24.5	70.5	18.8
83	2016-01-22 04:00:00	24	71.5	18.5
84	2016-01-22 05:00:00	24	72	18.6
85	2016-01-22 06:00:00	24	72.5	18.7
86	2016-01-22 07:00:00	23.5	73.5	18.5
87	2016-01-22 08:00:00	23.5	73.5	18.5
88	2016-01-22 09:00:00	24	75	19.3
89	2016-01-22 10:00:00	24.5	75	19.8
90	2016-01-22 11:00:00	25	73.5	19.9
91	2016-01-22 12:00:00	25.5	72.5	20.2
92	2016-01-22 13:00:00	26.5	71	20.8
93	2016-01-22 14:00:00	27.5	68.5	21.2
94	2016-01-22 15:00:00	28.5	67.5	21.9
95	2016-01-22 16:00:00	29	63.5	21.4
96	2016-01-22 17:00:00	29	62.5	21.1
97	2016-01-22 18:00:00	29	62.5	21.1
98	2016-01-22 19:00:00	28.5	64.5	21.1
99	2016-01-22 20:00:00	28	66	21.1
100	2016-01-22 21:00:00	28	66.5	21.2
101	2016-01-22 22:00:00	27.5	66.5	20.7
102	2016-01-22 23:00:00	27.5	66.5	20.7
103	2016-01-23	27	66	20.1
104	2016-01-23 01:00:00	26.5	64.5	19.3
105	2016-01-23 02:00:00	26	65	18.9
106	2016-01-23 03:00:00	25.5	66.5	18.8
107	2016-01-23 04:00:00	25.5	67	18.9
108	2016-01-23 05:00:00	25	66.5	18.3
109	2016-01-23 06:00:00	24.5	66.5	17.9
110	2016-01-23 07:00:00	24	67.5	17.6
111	2016-01-23 08:00:00	24	69	18
112	2016-01-23 09:00:00	24	69.5	18.1
113	2016-01-23 10:00:00	25	70	19.1
114	2016-01-23 11:00:00	26.5	64	19.1
115	2016-01-23 12:00:00	28	62	20
116	2016-01-23 13:00:00	29	59.5	20.3
117	2016-01-23 14:00:00	29.5	59.5	20.8
118	2016-01-23 15:00:00	30	59	21.1
119	2016-01-23 16:00:00	30	55.5	20.1
120	2016-01-23 17:00:00	30	58	20.8
121	2016-01-23 18:00:00	30	57	20.5
122	2016-01-23 19:00:00	30	58.5	21
123	2016-01-23 20:00:00	29.5	58.5	20.5
124	2016-01-23 21:00:00	29	60.5	20.6
125	2016-01-23 22:00:00	28.5	61.5	20.4
126	2016-01-23 23:00:00	28	64.5	20.7
127	2016-01-24	27.5	62.5	19.7
128	2016-01-24 01:00:00	27	62.5	19.2
129	2016-01-24 02:00:00	26.5	62	18.6
130	2016-01-24 03:00:00	25.5	63	17.9
131	2016-01-24 04:00:00	25	61.5	17.1
132	2016-01-24 05:00:00	25	64.5	17.8
133	2016-01-24 06:00:00	25	66	18.2
134	2016-01-24 07:00:00	24.5	67.5	18.1
135	2016-01-24 08:00:00	24.5	67.5	18.1
136	2016-01-24 09:00:00	24.5	67.5	18.1
137	2016-01-24 10:00:00	25	69.5	19
138	2016-01-24 11:00:00	26.5	68	20.1
139	2016-01-24 12:00:00	27.5	65.5	20.5
140	2016-01-24 13:00:00	28.5	61.5	20.4
141	2016-01-24 14:00:00	29.5	59	20.6
142	2016-01-24 15:00:00	30	58.5	21
143	2016-01-24 16:00:00	30.5	57.5	21.2
144	2016-01-24 17:00:00	30.5	52.5	19.7
145	2016-01-24 18:00:00	29.5	55.5	19.7
146	2016-01-24 19:00:00	29	55.5	19.2
147	2016-01-24 20:00:00	28	57	18.7
148	2016-01-24 21:00:00	28	59.5	19.4
149	2016-01-24 22:00:00	27.5	60	19
150	2016-01-24 23:00:00	27.5	61	19.3
151	2016-01-25	27	61	18.8
152	2016-01-25 01:00:00	26.5	62.5	18.8
153	2016-01-25 02:00:00	26.5	63	18.9
154	2016-01-25 03:00:00	26	63.5	18.5
155	2016-01-25 04:00:00	25.5	64	18.2
156	2016-01-25 05:00:00	25.5	64.5	18.3
157	2016-01-25 06:00:00	25	64.5	17.8
158	2016-01-25 07:00:00	24.5	66.5	17.9
159	2016-01-25 08:00:00	25	66.5	18.3
160	2016-01-25 09:00:00	25	67	18.4
161	2016-01-25 10:00:00	25.5	68.5	19.3
162	2016-01-25 11:00:00	26	66.5	19.3
163	2016-01-25 12:00:00	26.5	65.5	19.5
164	2016-01-25 13:00:00	27.5	63.5	20
165	2016-01-25 14:00:00	28	62	20
166	2016-01-25 15:00:00	29.5	58.5	20.5
167	2016-01-25 16:00:00	29.5	55	19.5
168	2016-01-25 17:00:00	29.5	54	19.2
169	2016-01-25 18:00:00	29	54.5	18.9
170	2016-01-25 19:00:00	28.5	53	18
171	2016-01-25 20:00:00	27.5	55	17.7
172	2016-01-25 21:00:00	27.5	57	18.2
173	2016-01-25 22:00:00	27	57.5	17.9
174	2016-01-25 23:00:00	27	56	17.5
175	2016-01-26	26.5	58	17.6
176	2016-01-26 01:00:00	26	60	17.6
177	2016-01-26 02:00:00	25.5	62	17.7
178	2016-01-26 03:00:00	25	62.5	17.3
179	2016-01-26 04:00:00	24.5	62.5	16.9
180	2016-01-26 05:00:00	24	63	16.5
181	2016-01-26 06:00:00	24	63.5	16.6
182	2016-01-26 07:00:00	23.5	64.5	16.4
183	2016-01-26 08:00:00	23.5	65	16.5
184	2016-01-26 09:00:00	23.5	65	16.5
185	2016-01-26 10:00:00	24.5	66.5	17.9
186	2016-01-26 11:00:00	26.5	63.5	19
187	2016-01-26 12:00:00	27.5	61	19.3
188	2016-01-26 13:00:00	29	58.5	20
189	2016-01-26 14:00:00	29.5	56.5	19.9
190	2016-01-26 15:00:00	29.5	55.5	19.7
191	2016-01-26 16:00:00	28.5	55	18.6
192	2016-01-26 17:00:00	28	56.5	18.5
193	2016-01-26 18:00:00	28.5	57	19.2
194	2016-01-26 19:00:00	28.5	57	19.2
195	2016-01-26 20:00:00	27.5	56	17.9
196	2016-01-26 21:00:00	27	57.5	17.9
197	2016-01-26 22:00:00	27	57	17.8
198	2016-01-26 23:00:00	27	57.5	17.9
199	2016-01-27	26.5	59	17.8
200	2016-01-27 01:00:00	26	61	17.9
201	2016-01-27 02:00:00	25.5	61	17.4
202	2016-01-27 03:00:00	25	63.5	17.6
203	2016-01-27 04:00:00	25	65	18
204	2016-01-27 05:00:00	24.5	64.5	17.4
205	2016-01-27 06:00:00	24.5	65.5	17.6
206	2016-01-27 07:00:00	24	66	17.3
207	2016-01-27 08:00:00	24	67	17.5
208	2016-01-27 09:00:00	24	66.5	17.4
209	2016-01-27 10:00:00	24.5	66	17.7
210	2016-01-27 11:00:00	25	67	18.4
211	2016-01-27 12:00:00	25.5	66.5	18.8
212	2016-01-27 13:00:00	26.5	66	19.6
213	2016-01-27 14:00:00	27.5	65	20.3
214	2016-01-27 15:00:00	28	61	19.8
215	2016-01-27 16:00:00	28.5	62.5	20.6
216	2016-01-27 17:00:00	28.5	62.5	20.6
217	2016-01-27 18:00:00	28	62	20
218	2016-01-27 19:00:00	27.5	63	19.8
219	2016-01-27 20:00:00	27	59	18.3
220	2016-01-27 21:00:00	26.5	60	18.1
221	2016-01-27 22:00:00	26.5	60.5	18.2
222	2016-01-27 23:00:00	26	61.5	18
223	2016-01-28	26	62	18.2
224	2016-01-28 01:00:00	25.5	63.5	18.1
225	2016-01-28 02:00:00	25	64.5	17.8
226	2016-01-28 03:00:00	25	65	18
227	2016-01-28 04:00:00	24.5	65	17.5
228	2016-01-28 05:00:00	24.5	64	17.2
229	2016-01-28 06:00:00	24	64	16.8
230	2016-01-28 07:00:00	23.5	66.5	16.9
231	2016-01-28 08:00:00	23.5	67.5	17.1
232	2016-01-28 09:00:00	23.5	68	17.3
233	2016-01-28 10:00:00	24	67.5	17.6
234	2016-01-28 11:00:00	24	68.5	17.8
235	2016-01-28 12:00:00	24	69.5	18.1
236	2016-01-28 13:00:00	24.5	70.5	18.8
237	2016-01-28 14:00:00	25.5	68.5	19.3
238	2016-01-28 15:00:00	26	67	19.4
239	2016-01-28 16:00:00	26.5	66	19.6
240	2016-01-28 17:00:00	27	65.5	20
241	2016-01-28 18:00:00	26.5	65.5	19.5
242	2016-01-28 19:00:00	26.5	65.5	19.5
243	2016-01-28 20:00:00	26	66.5	19.3
244	2016-01-28 21:00:00	26	67.5	19.5
245	2016-01-28 22:00:00	25.5	67	18.9
246	2016-01-28 23:00:00	25.5	67.5	19
247	2016-01-29	25.5	67.5	19
248	2016-01-29 01:00:00	25	68.5	18.8
249	2016-01-29 02:00:00	24.5	69.5	18.6
250	2016-01-29 03:00:00	24.5	70	18.7
251	2016-01-29 04:00:00	24	70	18.2
252	2016-01-29 05:00:00	24	70.5	18.3
253	2016-01-29 06:00:00	24	71.5	18.5
254	2016-01-29 07:00:00	23.5	71.5	18
255	2016-01-29 08:00:00	23.5	72.5	18.3
256	2016-01-29 09:00:00	24	73.5	19
257	2016-01-29 10:00:00	24.5	72.5	19.2
258	2016-01-29 11:00:00	25	71.5	19.5
259	2016-01-29 12:00:00	26	68	19.6
260	2016-01-29 13:00:00	27	63	19.4
261	2016-01-29 14:00:00	27.5	62.5	19.7
262	2016-01-29 15:00:00	27.5	66	20.6
263	2016-01-29 16:00:00	28.5	64	21
264	2016-01-29 17:00:00	28	63	20.3
265	2016-01-29 18:00:00	28	62.5	20.2
266	2016-01-29 19:00:00	27	63.5	19.5
267	2016-01-29 20:00:00	26	65.5	19
268	2016-01-29 21:00:00	25.5	66.5	18.8
269	2016-01-29 22:00:00	25	67	18.4
270	2016-01-29 23:00:00	25	67	18.4
271	2016-01-30	24.5	66.5	17.9
272	2016-01-30 01:00:00	24	66.5	17.4
273	2016-01-30 02:00:00	23.5	68.5	17.4
274	2016-01-30 03:00:00	23.5	70	17.7
275	2016-01-30 04:00:00	23	69.5	17.1
276	2016-01-30 05:00:00	23	70	17.2
277	2016-01-30 06:00:00	23	71	17.5
278	2016-01-30 07:00:00	22.5	72	17.2
279	2016-01-30 08:00:00	22.5	72.5	17.3
280	2016-01-30 09:00:00	23	75	18.3
281	2016-01-30 10:00:00	23.5	75	18.8
282	2016-01-30 11:00:00	24.5	75	19.8
283	2016-01-30 12:00:00	26	71.5	20.4
284	2016-01-30 13:00:00	27	67.5	20.5
285	2016-01-30 14:00:00	28	63.5	20.4
286	2016-01-30 15:00:00	29	60	20.4
287	2016-01-30 16:00:00	29.5	57.5	20.2
288	2016-01-30 17:00:00	29	57.5	19.8
289	2016-01-30 18:00:00	28.5	60	20
290	2016-01-30 19:00:00	28	62	20
291	2016-01-30 20:00:00	27.5	62.5	19.7
292	2016-01-30 21:00:00	27	63.5	19.5
293	2016-01-30 22:00:00	26.5	63.5	19
294	2016-01-30 23:00:00	26.5	63.5	19
295	2016-01-31	26	64.5	18.8
296	2016-01-31 01:00:00	26	65.5	19
297	2016-01-31 02:00:00	25.5	66	18.7
298	2016-01-31 03:00:00	25.5	66	18.7
299	2016-01-31 04:00:00	25	66	18.2
300	2016-01-31 05:00:00	24.5	66.5	17.9
301	2016-01-31 06:00:00	24	66	17.3
302	2016-01-31 07:00:00	23.5	66.5	16.9
303	2016-01-31 08:00:00	23.5	67.5	17.1
304	2016-01-31 09:00:00	23	68.5	16.9
305	2016-01-31 10:00:00	23	69.5	17.1
306	2016-01-31 11:00:00	24	73.5	19
307	2016-01-31 12:00:00	25	70.5	19.3
308	2016-01-31 13:00:00	25.5	68	19.2
309	2016-01-31 14:00:00	26.5	67	19.9
310	2016-01-31 15:00:00	27	64	19.6
311	2016-01-31 16:00:00	28	58	19
312	2016-01-31 17:00:00	28.5	58	19.4
313	2016-01-31 18:00:00	28.5	58	19.4
314	2016-01-31 19:00:00	27.5	60	19
315	2016-01-31 20:00:00	27	61.5	19
316	2016-01-31 21:00:00	26.5	61.5	18.5
317	2016-01-31 22:00:00	26	60.5	17.8
318	2016-01-31 23:00:00	26	60	17.6
319	2016-02-01	25.5	60	17.2
320	2016-02-01 01:00:00	25	62	17.2
321	2016-02-01 02:00:00	24.5	63	17
322	2016-02-01 03:00:00	24.5	65	17.5
323	2016-02-01 04:00:00	24	65	17
324	2016-02-01 05:00:00	24	66	17.3
325	2016-02-01 06:00:00	23.5	64.5	16.4
326	2016-02-01 07:00:00	23.5	66.5	16.9
327	2016-02-01 08:00:00	23.5	67.5	17.1
328	2016-02-01 09:00:00	24	68	17.7
329	2016-02-01 10:00:00	25	65	18
330	2016-02-01 11:00:00	26	62.5	18.3
331	2016-02-01 12:00:00	27	59.5	18.4
332	2016-02-01 13:00:00	28	59.5	19.4
333	2016-02-01 14:00:00	28.5	58	19.4
334	2016-02-01 15:00:00	29.5	54.5	19.4
335	2016-02-01 16:00:00	29.5	55.5	19.7
336	2016-02-01 17:00:00	30	55	20
337	2016-02-01 18:00:00	29.5	55.5	19.7
338	2016-02-01 19:00:00	29	56.5	19.5
339	2016-02-01 20:00:00	28	59	19.2
340	2016-02-01 21:00:00	27.5	59.5	18.9
341	2016-02-01 22:00:00	27.5	62	19.6
342	2016-02-01 23:00:00	27	63	19.4
343	2016-02-02	26.5	64	19.1
344	2016-02-02 01:00:00	26.5	64	19.1
345	2016-02-02 02:00:00	25.5	65	18.4
346	2016-02-02 03:00:00	25	66	18.2
347	2016-02-02 04:00:00	24.5	66.5	17.9
348	2016-02-02 05:00:00	24	67	17.5
349	2016-02-02 06:00:00	23.5	67.5	17.1
350	2016-02-02 07:00:00	23.5	70	17.7
351	2016-02-02 08:00:00	23.5	71	17.9
352	2016-02-02 09:00:00	23.5	71	17.9
353	2016-02-02 10:00:00	24	73	18.9
354	2016-02-02 11:00:00	25.5	70	19.6
355	2016-02-02 12:00:00	27	66	20.1
356	2016-02-02 13:00:00	28	62.5	20.2
357	2016-02-02 14:00:00	29	58.5	20
358	2016-02-02 15:00:00	29.5	58	20.4
359	2016-02-02 16:00:00	30	54	19.7
360	2016-02-02 17:00:00	30.5	54	20.1
361	2016-02-02 18:00:00	30	54.5	19.8
362	2016-02-02 19:00:00	29.5	57.5	20.2
363	2016-02-02 20:00:00	29	57.5	19.8
364	2016-02-02 21:00:00	28	59	19.2
365	2016-02-02 22:00:00	27.5	59.5	18.9
366	2016-02-02 23:00:00	27.5	60.5	19.2
367	2016-02-03	26.5	60.5	18.2
368	2016-02-03 01:00:00	26	60.5	17.8
369	2016-02-03 02:00:00	25.5	60	17.2
370	2016-02-03 03:00:00	25	60.5	16.8
371	2016-02-03 04:00:00	24.5	61.5	16.6
372	2016-02-03 05:00:00	24	63	16.5
373	2016-02-03 06:00:00	24	63.5	16.6
374	2016-02-03 07:00:00	23.5	65	16.5
375	2016-02-03 08:00:00	23.5	67	17
376	2016-02-03 09:00:00	24	68	17.7
377	2016-02-03 10:00:00	24.5	65	17.5
378	2016-02-03 11:00:00	26	62.5	18.3
379	2016-02-03 12:00:00	27	58.5	18.2
380	2016-02-03 13:00:00	28	56	18.4
381	2016-02-03 14:00:00	29	55.5	19.2
382	2016-02-03 15:00:00	30	54.5	19.8
383	2016-02-03 16:00:00	30.5	52.5	19.7
384	2016-02-03 17:00:00	30.5	53.5	20
385	2016-02-03 18:00:00	30.5	54	20.1
386	2016-02-03 19:00:00	30	54.5	19.8
387	2016-02-03 20:00:00	29	55.5	19.2
388	2016-02-03 21:00:00	28.5	54	18.3
389	2016-02-03 22:00:00	28	55	18.1
390	2016-02-03 23:00:00	27	56.5	17.6
391	2016-02-04	26.5	57	17.3
392	2016-02-04 01:00:00	26	58	17.1
393	2016-02-04 02:00:00	25.5	60	17.2
394	2016-02-04 03:00:00	25	60	16.7
395	2016-02-04 04:00:00	24.5	61	16.5
396	2016-02-04 05:00:00	24	61.5	16.1
397	2016-02-04 06:00:00	24	62	16.3
398	2016-02-04 07:00:00	23.5	62.5	15.9
399	2016-02-04 08:00:00	23.5	63.5	16.2
400	2016-02-04 09:00:00	24	63.5	16.6
401	2016-02-04 10:00:00	25	59.5	16.6
402	2016-02-04 11:00:00	26.5	55.5	16.9
403	2016-02-04 12:00:00	28	52.5	17.4
404	2016-02-04 13:00:00	29	51	17.8
405	2016-02-04 14:00:00	30	50	18.4
406	2016-02-04 15:00:00	31	49	19
407	2016-02-04 16:00:00	31	49	19
408	2016-02-04 17:00:00	31	49.5	19.2
409	2016-02-04 18:00:00	30	50.5	18.6
410	2016-02-04 19:00:00	29	53.5	18.6
411	2016-02-04 20:00:00	28.5	53.5	18.1
412	2016-02-04 21:00:00	28	55	18.1
413	2016-02-04 22:00:00	27.5	55	17.7
414	2016-02-04 23:00:00	27	55.5	17.3
415	2016-02-05	27	57	17.8
416	2016-02-05 01:00:00	26.5	58.5	17.7
417	2016-02-05 02:00:00	26	61	17.9
418	2016-02-05 03:00:00	25.5	61.5	17.6
419	2016-02-05 04:00:00	25	62	17.2
420	2016-02-05 05:00:00	24.5	63.5	17.1
421	2016-02-05 06:00:00	24.5	64.5	17.4
422	2016-02-05 07:00:00	24	64.5	16.9
423	2016-02-05 08:00:00	24	66.5	17.4
424	2016-02-05 09:00:00	24.5	65.5	17.6
425	2016-02-05 10:00:00	25	60.5	16.8
426	2016-02-05 11:00:00	26.5	56.5	17.1
427	2016-02-05 12:00:00	27.5	53	17.1
428	2016-02-05 13:00:00	28.5	51	17.4
429	2016-02-05 14:00:00	29.5	51	18.3
430	2016-02-05 15:00:00	30.5	49	18.6
431	2016-02-05 16:00:00	31	47.5	18.5
432	2016-02-05 17:00:00	31	45.5	17.8
433	2016-02-05 18:00:00	31	47.5	18.5
434	2016-02-05 19:00:00	30	49.5	18.3
435	2016-02-05 20:00:00	29	49.5	17.4
436	2016-02-05 21:00:00	28.5	49	16.7
437	2016-02-05 22:00:00	28	52.5	17.4
438	2016-02-05 23:00:00	27.5	55.5	17.8
439	2016-02-06	27.5	56.5	18.1
440	2016-02-06 01:00:00	27	57	17.8
441	2016-02-06 02:00:00	26.5	57.5	17.4
442	2016-02-06 03:00:00	26	58	17.1
443	2016-02-06 04:00:00	25.5	59	16.9
444	2016-02-06 05:00:00	25	59.5	16.6
445	2016-02-06 06:00:00	24.5	60	16.2
446	2016-02-06 07:00:00	24	61.5	16.1
447	2016-02-06 08:00:00	24	63.5	16.6
448	2016-02-06 09:00:00	24.5	64.5	17.4
449	2016-02-06 10:00:00	25.5	63.5	18.1
450	2016-02-06 11:00:00	27	59	18.3
451	2016-02-06 12:00:00	28.5	53	18
452	2016-02-06 13:00:00	29.5	49.5	17.8
453	2016-02-06 14:00:00	30.5	48.5	18.4
454	2016-02-06 15:00:00	31.5	46.5	18.6
455	2016-02-06 16:00:00	32	46	18.9
456	2016-02-06 17:00:00	32	46	18.9
457	2016-02-06 18:00:00	31.5	46	18.5
458	2016-02-06 19:00:00	31	47.5	18.5
459	2016-02-06 20:00:00	30	47.5	17.6
460	2016-02-06 21:00:00	29	50.5	17.7
461	2016-02-06 22:00:00	28.5	52	17.7
462	2016-02-06 23:00:00	28	52.5	17.4
463	2016-02-07	27.5	54	17.4
464	2016-02-07 01:00:00	27.5	55.5	17.8
465	2016-02-07 02:00:00	27	56.5	17.6
466	2016-02-07 03:00:00	26.5	57.5	17.4
467	2016-02-07 04:00:00	26.5	57.5	17.4
468	2016-02-07 05:00:00	25.5	59	16.9
469	2016-02-07 06:00:00	25	60.5	16.8
470	2016-02-07 07:00:00	24.5	61.5	16.6
471	2016-02-07 08:00:00	24.5	63	17
472	2016-02-07 09:00:00	24.5	64.5	17.4
473	2016-02-07 10:00:00	24.5	65	17.5
474	2016-02-07 11:00:00	25	64	17.7
475	2016-02-07 12:00:00	25.5	65.5	18.6
476	2016-02-07 13:00:00	26	66.5	19.3
477	2016-02-07 14:00:00	27	64.5	19.7
478	2016-02-07 15:00:00	27.5	65	20.3
479	2016-02-07 16:00:00	28.5	64	21
480	2016-02-07 17:00:00	29.5	60.5	21
481	2016-02-07 18:00:00	29	60	20.4
482	2016-02-07 19:00:00	28.5	61.5	20.4
483	2016-02-07 20:00:00	27.5	63	19.8
484	2016-02-07 21:00:00	27	63.5	19.5
485	2016-02-07 22:00:00	26.5	64	19.1
486	2016-02-07 23:00:00	26	63.5	18.5
487	2016-02-08	25.5	65	18.4
488	2016-02-08 01:00:00	25	65	18
489	2016-02-08 02:00:00	24.5	65	17.5
490	2016-02-08 03:00:00	24	68	17.7
491	2016-02-08 04:00:00	24	67.5	17.6
492	2016-02-08 05:00:00	23.5	68.5	17.4
493	2016-02-08 06:00:00	23.5	69.5	17.6
494	2016-02-08 07:00:00	23.5	70.5	17.8
495	2016-02-08 08:00:00	23.5	71.5	18
496	2016-02-08 09:00:00	23.5	72.5	18.3
497	2016-02-08 10:00:00	24	73	18.9
498	2016-02-08 11:00:00	24	73.5	19
499	2016-02-08 12:00:00	24.5	73.5	19.4
500	2016-02-08 13:00:00	25	72.5	19.7
501	2016-02-08 14:00:00	26.5	70.5	20.7
502	2016-02-08 15:00:00	27	66.5	20.2
503	2016-02-08 16:00:00	26.5	66	19.6
504	2016-02-08 17:00:00	26.5	64.5	19.3
505	2016-02-08 18:00:00	26.5	64.5	19.3
506	2016-02-08 19:00:00	26	66.5	19.3
507	2016-02-08 20:00:00	26	67	19.4
508	2016-02-08 21:00:00	26	67.5	19.5
509	2016-02-08 22:00:00	26	65.5	19
510	2016-02-08 23:00:00	25.5	64	18.2
511	2016-02-09	25.5	64.5	18.3
512	2016-02-09 01:00:00	25	65.5	18.1
513	2016-02-09 02:00:00	24.5	65.5	17.6
514	2016-02-09 03:00:00	24	64.5	16.9
515	2016-02-09 04:00:00	24	65.5	17.1
516	2016-02-09 05:00:00	23.5	65.5	16.7
517	2016-02-09 06:00:00	23	65.5	16.2
518	2016-02-09 07:00:00	23	66.5	16.4
519	2016-02-09 08:00:00	23.5	71	17.9
520	2016-02-09 09:00:00	23.5	70	17.7
521	2016-02-09 10:00:00	23.5	69	17.5
522	2016-02-09 11:00:00	23.5	69.5	17.6
523	2016-02-09 12:00:00	24	69	18
524	2016-02-09 13:00:00	24.5	69.5	18.6
525	2016-02-09 14:00:00	24.5	69.5	18.6
526	2016-02-09 15:00:00	24.5	70.5	18.8
527	2016-02-09 16:00:00	25.5	71	19.9
528	2016-02-09 17:00:00	26	68.5	19.8
529	2016-02-09 18:00:00	26	68	19.6
530	2016-02-09 19:00:00	25.5	70	19.6
531	2016-02-09 20:00:00	25.5	71	19.9
532	2016-02-09 21:00:00	25	71	19.4
533	2016-02-09 22:00:00	25	70	19.1
534	2016-02-09 23:00:00	25	70	19.1
535	2016-02-10	24.5	69	18.4
536	2016-02-10 01:00:00	24	69.5	18.1
537	2016-02-10 02:00:00	23.5	70	17.7
538	2016-02-10 03:00:00	23	71	17.5
539	2016-02-10 04:00:00	22.5	71	17
540	2016-02-10 05:00:00	22.5	71.5	17.1
541	2016-02-10 06:00:00	22	73	16.9
542	2016-02-10 07:00:00	22	74	17.2
543	2016-02-10 08:00:00	22	76	17.6
544	2016-02-10 09:00:00	22.5	78	18.5
545	2016-02-10 10:00:00	23.5	77	19.2
546	2016-02-10 11:00:00	24.5	75	19.8
547	2016-02-10 12:00:00	25.5	73.5	20.4
548	2016-02-10 13:00:00	26.5	71	20.8
549	2016-02-10 14:00:00	28	67.5	21.4
550	2016-02-10 15:00:00	27	65.5	20
551	2016-02-10 16:00:00	26.5	68.5	20.2
552	2016-02-10 17:00:00	26	69.5	20
553	2016-02-10 18:00:00	25.5	70	19.6
554	2016-02-10 19:00:00	25	68.5	18.8
555	2016-02-10 20:00:00	25	69.5	19
556	2016-02-10 21:00:00	25	70	19.1
557	2016-02-10 22:00:00	24.5	70.5	18.8
558	2016-02-10 23:00:00	24.5	72	19.1
559	2016-02-11	24.5	72	19.1
560	2016-02-11 01:00:00	24	72	18.6
561	2016-02-11 02:00:00	23.5	72.5	18.3
562	2016-02-11 03:00:00	23	73.5	18
563	2016-02-11 04:00:00	23	74.5	18.2
564	2016-02-11 05:00:00	22.5	74	17.6
565	2016-02-11 06:00:00	22.5	74.5	17.7
566	2016-02-11 07:00:00	22.5	75.5	18
567	2016-02-11 08:00:00	22.5	76.5	18.2
568	2016-02-11 09:00:00	22.5	75.5	18
569	2016-02-11 10:00:00	22	73.5	17
570	2016-02-11 11:00:00	22	74.5	17.3
571	2016-02-11 12:00:00	22.5	76	18.1
572	2016-02-11 13:00:00	22.5	76.5	18.2
573	2016-02-11 14:00:00	23	76.5	18.6
574	2016-02-11 15:00:00	23	77.5	18.9
575	2016-02-11 16:00:00	23.5	75.5	18.9
576	2016-02-11 17:00:00	24	75	19.3
577	2016-02-11 18:00:00	24	75	19.3
578	2016-02-11 19:00:00	23.5	75	18.8
579	2016-02-11 20:00:00	23.5	74	18.6
580	2016-02-11 21:00:00	23	74	18.1
581	2016-02-11 22:00:00	22.5	74	17.6
582	2016-02-11 23:00:00	22.5	74	17.6
583	2016-02-12	22	76	17.6
584	2016-02-12 01:00:00	21.5	76	17.1
585	2016-02-12 02:00:00	21.5	76.5	17.2
586	2016-02-12 03:00:00	21	77.5	16.9
587	2016-02-12 04:00:00	21	77.5	16.9
588	2016-02-12 05:00:00	21	77.5	16.9
589	2016-02-12 06:00:00	21	77	16.8
590	2016-02-12 07:00:00	20.5	77	16.3
591	2016-02-12 08:00:00	20.5	79	16.7
592	2016-02-12 09:00:00	21	79.5	17.3
593	2016-02-12 10:00:00	21.5	79.5	17.8
594	2016-02-12 11:00:00	22.5	81	19.1
595	2016-02-12 12:00:00	24	79.5	20.2
596	2016-02-12 13:00:00	25	77.5	20.8
597	2016-02-12 14:00:00	26	76	21.4
598	2016-02-12 15:00:00	27	73	21.7
599	2016-02-12 16:00:00	28	70	22
600	2016-02-12 17:00:00	28.5	68	22
601	2016-02-12 18:00:00	28.5	68.5	22.1
602	2016-02-12 19:00:00	28	69.5	21.9
603	2016-02-12 20:00:00	27.5	69.5	21.4
604	2016-02-12 21:00:00	27	69	20.8
605	2016-02-12 22:00:00	26.5	68.5	20.2
606	2016-02-12 23:00:00	26	68.5	19.8
607	2016-02-13	25.5	68.5	19.3
608	2016-02-13 01:00:00	25	69	18.9
609	2016-02-13 02:00:00	24.5	69	18.4
610	2016-02-13 03:00:00	24	70.5	18.3
611	2016-02-13 04:00:00	23.5	71	17.9
612	2016-02-13 05:00:00	23.5	71.5	18
613	2016-02-13 06:00:00	23.5	72	18.2
614	2016-02-13 07:00:00	23	72.5	17.8
615	2016-02-13 08:00:00	23	73	17.9
616	2016-02-13 09:00:00	23.5	74.5	18.7
617	2016-02-13 10:00:00	24.5	73.5	19.4
618	2016-02-13 11:00:00	25	70.5	19.3
619	2016-02-13 12:00:00	26.5	67	19.9
620	2016-02-13 13:00:00	27.5	64	20.1
621	2016-02-13 14:00:00	28.5	62	20.5
622	2016-02-13 15:00:00	29.5	59	20.6
623	2016-02-13 16:00:00	30	55.5	20.1
624	2016-02-13 17:00:00	30	52	19.1
625	2016-02-13 18:00:00	30	51.5	18.9
626	2016-02-13 19:00:00	29	52.5	18.3
627	2016-02-13 20:00:00	28.5	56.5	19
628	2016-02-13 21:00:00	27.5	58	18.5
629	2016-02-13 22:00:00	27	60	18.6
630	2016-02-13 23:00:00	27	61.5	19
631	2016-02-14	26.5	61.5	18.5
632	2016-02-14 01:00:00	26	62	18.2
633	2016-02-14 02:00:00	25	62.5	17.3
634	2016-02-14 03:00:00	24.5	63	17
635	2016-02-14 04:00:00	24	63.5	16.6
636	2016-02-14 05:00:00	23.5	64.5	16.4
637	2016-02-14 06:00:00	23	65	16.1
638	2016-02-14 07:00:00	23	66	16.3
639	2016-02-14 08:00:00	23	67.5	16.7
640	2016-02-14 09:00:00	23	69	17
641	2016-02-14 10:00:00	24	69	18
642	2016-02-14 11:00:00	25.5	66	18.7
643	2016-02-14 12:00:00	26.5	63	18.9
644	2016-02-14 13:00:00	27.5	58.5	18.6
645	2016-02-14 14:00:00	28.5	55.5	18.7
646	2016-02-14 15:00:00	29.5	51.5	18.5
647	2016-02-14 16:00:00	30	48.5	18
648	2016-02-14 17:00:00	30	45.5	16.9
649	2016-02-14 18:00:00	30	48	17.8
650	2016-02-14 19:00:00	29	51	17.8
651	2016-02-14 20:00:00	28	55	18.1
652	2016-02-14 21:00:00	27.5	56.5	18.1
653	2016-02-14 22:00:00	27	58	18
654	2016-02-14 23:00:00	26.5	59	17.8
655	2016-02-15	26.5	60	18.1
656	2016-02-15 01:00:00	26.5	60	18.1
657	2016-02-15 02:00:00	26	59.5	17.5
658	2016-02-15 03:00:00	25.5	59	16.9
659	2016-02-15 04:00:00	24.5	59.5	16.1
660	2016-02-15 05:00:00	24	61	16
661	2016-02-15 06:00:00	23.5	62	15.8
662	2016-02-15 07:00:00	23	64	15.8
663	2016-02-15 08:00:00	23	66	16.3
664	2016-02-15 09:00:00	23.5	67	17
665	2016-02-15 10:00:00	24.5	67.5	18.1
666	2016-02-15 11:00:00	25.5	63.5	18.1
667	2016-02-15 12:00:00	27	59	18.3
668	2016-02-15 13:00:00	28	56	18.4
669	2016-02-15 14:00:00	29	54	18.7
670	2016-02-15 15:00:00	30	51.5	18.9
671	2016-02-15 16:00:00	31	48.5	18.9
672	2016-02-15 17:00:00	31	47.5	18.5
673	2016-02-15 18:00:00	31	47	18.4
674	2016-02-15 19:00:00	30	50.5	18.6
675	2016-02-15 20:00:00	29.5	54	19.2
676	2016-02-15 21:00:00	28.5	54.5	18.4
677	2016-02-15 22:00:00	28	56	18.4
678	2016-02-15 23:00:00	27.5	56.5	18.1
679	2016-02-16	27	57	17.8
680	2016-02-16 01:00:00	26.5	58	17.6
681	2016-02-16 02:00:00	25.5	59	16.9
682	2016-02-16 03:00:00	25	59.5	16.6
683	2016-02-16 04:00:00	24.5	60.5	16.4
684	2016-02-16 05:00:00	24	62.5	16.4
685	2016-02-16 06:00:00	24	64	16.8
686	2016-02-16 07:00:00	24	65.5	17.1
687	2016-02-16 08:00:00	24	66	17.3
688	2016-02-16 09:00:00	24.5	67	18
689	2016-02-16 10:00:00	27	59	18.3
690	2016-02-16 11:00:00	30	52	19.1
691	2016-02-16 12:00:00	32	46	18.9
692	2016-02-16 13:00:00	33.5	42	18.8
693	2016-02-16 14:00:00	35	41.5	20
694	2016-02-16 15:00:00	35	38.5	18.8
695	2016-02-16 16:00:00	35	38	18.6
696	2016-02-16 17:00:00	33.5	38	17.2
697	2016-02-16 18:00:00	31.5	42	17
698	2016-02-16 19:00:00	28.5	50	17.1
699	2016-02-16 20:00:00	27	55	17.2
700	2016-02-16 21:00:00	25.5	58.5	16.8
701	2016-02-16 22:00:00	25	61.5	17.1
702	2016-02-16 23:00:00	24	64.5	16.9
703	2016-02-17	24	64.5	16.9
704	2016-02-17 01:00:00	23.5	65.5	16.7
705	2016-02-17 02:00:00	23	66	16.3
706	2016-02-17 03:00:00	22.5	67.5	16.2
707	2016-02-17 04:00:00	22	68	15.8
708	2016-02-17 05:00:00	21.5	69	15.6
709	2016-02-17 06:00:00	21	70.5	15.4
710	2016-02-17 07:00:00	20.5	75	15.9
711	2016-02-17 08:00:00	21.5	77.5	17.4
712	2016-02-17 09:00:00	21.5	78	17.5
713	2016-02-17 10:00:00	24.5	72	19.1
714	2016-02-17 11:00:00	27.5	62	19.6
715	2016-02-17 12:00:00	29.5	55.5	19.7
716	2016-02-17 13:00:00	33.5	49	21.3
717	2016-02-17 14:00:00	34.5	44.5	20.6
718	2016-02-17 15:00:00	34	44	20
719	2016-02-17 16:00:00	35	40	19.4
720	2016-02-17 17:00:00	33.5	40	18
721	2016-02-17 18:00:00	31.5	42	17
722	2016-02-17 19:00:00	29	50	17.5
723	2016-02-17 20:00:00	26.5	54.5	16.6
724	2016-02-17 21:00:00	26	54.5	16.1
725	2016-02-17 22:00:00	25	57	15.9
726	2016-02-17 23:00:00	24.5	58	15.7
727	2016-02-18	24.5	60.5	16.4
728	2016-02-18 01:00:00	24.5	62	16.7
729	2016-02-18 02:00:00	24	64.5	16.9
730	2016-02-18 03:00:00	23.5	66	16.8
731	2016-02-18 04:00:00	23	67.5	16.7
732	2016-02-18 05:00:00	22.5	69	16.5
733	2016-02-18 06:00:00	22	71	16.5
734	2016-02-18 07:00:00	22.5	74.5	17.7
735	2016-02-18 08:00:00	23	74.5	18.2
736	2016-02-18 09:00:00	24.5	70.5	18.8
737	2016-02-18 10:00:00	28.5	64	21
738	2016-02-18 11:00:00	29.5	58.5	20.5
739	2016-02-18 12:00:00	29.5	56.5	19.9
740	2016-02-18 13:00:00	32	53.5	21.4
741	2016-02-18 14:00:00	35.5	45.5	21.9
742	2016-02-18 15:00:00	34	45.5	20.6
743	2016-02-18 16:00:00	35	43.5	20.7
744	2016-02-18 17:00:00	32	45.5	18.8
745	2016-02-18 18:00:00	29	54	18.7
746	2016-02-18 19:00:00	28.5	58	19.4
747	2016-02-18 20:00:00	27.5	60.5	19.2
748	2016-02-18 21:00:00	26.5	64.5	19.3
749	2016-02-18 22:00:00	24	68	17.7
750	2016-02-18 23:00:00	23.5	71	17.9
751	2016-02-19	23.5	71	17.9
752	2016-02-19 01:00:00	23.5	70.5	17.8
753	2016-02-19 02:00:00	23.5	70.5	17.8
754	2016-02-19 03:00:00	23.5	72	18.2
755	2016-02-19 04:00:00	22	73.5	17
756	2016-02-19 05:00:00	22	74	17.2
757	2016-02-19 06:00:00	21.5	74.5	16.8
758	2016-02-19 07:00:00	21.5	77.5	17.4
759	2016-02-19 08:00:00	21.5	78	17.5
760	2016-02-19 09:00:00	21.5	79	17.7
761	2016-02-19 10:00:00	23	79.5	19.3
762	2016-02-19 11:00:00	24	76.5	19.6
763	2016-02-19 12:00:00	25.5	69	19.4
764	2016-02-19 13:00:00	26	67.5	19.5
765	2016-02-19 14:00:00	30.5	63.5	22.8
766	2016-02-19 15:00:00	27.5	66	20.6
767	2016-02-19 16:00:00	28.5	64.5	21.1
768	2016-02-19 17:00:00	27.5	62	19.6
769	2016-02-19 18:00:00	27.5	64	20.1
																									769

## Sheet: SAS-2
					ods rtf file= 'Physical disturbance analysis.rtf';
					Title 'Physicaldisturbance';
					Data Physical disturbance;
					input Trmt	$Reg$	rep	Time	Mort LSZ;
					Cards;
					Trmt	Reg	rep	Time	Mort	LSZ
					1	dom	1	30	94	4
					1	dom	1	30	100	8
					1	dom	1	30	64	12
					2	dom	2	30	60	4
					2	dom	2	30	100	4
					2	dom	2	30	100	8
					3	dom	3	30	100	4
					3	dom	3	30	100	4
					3	dom	3	30	94	4
					4	kil	1	30	88	0
					4	kil	1	30	94	4
					4	kil	1	30	100	0
					5	kil	2	30	60	8
					5	kil	2	30	100	0
					5	kil	2	30	100	0
					6	kil	3	30	100	0
					6	kil	3	30	100	0
					6	kil	3	30	100	0
					7	bbt	1	30	100	0
					7	bbt	1	30	50	0
					7	bbt	1	30	100	0
					8	bbt	2	30	96	0
					8	bbt	2	30	100	4
					8	bbt	2	30	100	4
					9	bbt	3	30	100	0
					9	bbt	3	30	40	0
					9	bbt	3	30	33	0
					10	dom	1	60	100	0
					10	dom	1	60	77	4
					10	dom	1	60	100	4
					11	dom	2	60	100	8
					11	dom	2	60	100	0
					11	dom	2	60	100	4
					12	dom	3	60	100	0
					12	dom	3	60	100	0
					12	dom	3	60	100	4
					13	kil	1	60	100	8
					13	kil	1	60	100	8
					13	kil	1	60	86	0
					14	kil	2	60	100	4
					14	kil	2	60	100	8
					14	kil	2	60	100	0
					15	kil	3	60	100	0
					15	kil	3	60	100	8
					15	kil	3	60	86	0
					16	bbt	1	60	64	0
					16	bbt	1	60	100	4
					16	bbt	1	60	100	0
					17	bbt	2	60	100	0
					17	bbt	2	60	100	0
					17	bbt	2	60	92	0
					18	bbt	3	60	100	0
					18	bbt	3	60	100	0
					18	bbt	3	60	100	0
					19	dom	1	90	94	0
					19	dom	1	90	100	4
					19	dom	1	90	100	0
					20	dom	2	90	100	0
					20	dom	2	90	100	0
					20	dom	2	90	100	0
					21	dom	3	90	100	0
					21	dom	3	90	100	0
					21	dom	3	90	100	0
					22	kil	1	90	100	0
					22	kil	1	90	100	0
					22	kil	1	90	100	4
					23	kil	2	90	100	4
					23	kil	2	90	83	0
					23	kil	2	90	89	0
					24	kil	3	90	100	0
					24	kil	3	90	90	8
					24	kil	3	90	86	0
					25	bbt	1	90	100	0
					25	bbt	1	90	100	0
					25	bbt	1	90	100	4
					26	bbt	2	90	100	4
					26	bbt	2	90	83	0
					26	bbt	2	90	89	0
					27	bbt	3	90	100	0
					27	bbt	3	90	90	8
					27	bbt	3	90	92	0
					RUN;
					PROC MEANS;
					CLASS Time;
					VAR mort LSZ;
					RUN;
					PROC MEANS;
					CLASS reg;
					VAR mort LSZ;
					RUN;
					PROC GLM;
					CLASS Reg Time ;
					MODEL Mort LSZ		LSZ = Reg|Time;
					MEANS Reg/LSD;
					MEANS Time/LSD;
					run;
					PROC GLM;
					CLASS TRMT;
					MODEL Mort	LSZ= TRMT;
					MEANS TRMT/LSD;
					RUN;
					ods rtf close;
